# Supplementary material for: Mendelian randomization analysis provides causality of smoking on the expression of ACE2, a putative SARS-CoV-2 receptor
Source: eLife. 2021 Jul 6;10:e64188. doi: 10.7554/eLife.64188 (PMC8282334; doi:10.7554/eLife.64188)
Supplement: Supplementary file 1. — (a) Information of genome-wide significant single nucleotide polymorphisms (SNPs) associated with smoking initiation. (b) Information of genome-wide significant SNPs associated with cigarettes per day. (c) Information of genome-wide significant SNPs associated with drinks per week. (d) Sample size of ACE2 expression in 44 tissues/organs from GTEx database. (e) Statistical power in Mendelian randomization study on causal association of smoking and alcohol consumption with ACE2 expression andCOVID-19 related adverse outcomes. (f) Causal association of smoking initiation and ACE2 expression. (g) Causal association of cigarettes per day and ACE2 expression. (h) Causal association of drinks per week and ACE2 expression. (i) Causal association of smoking initiation and ACE2 expression excluding palindromic SNPs. (j) Causal association of cigarettes per day and ACE2 expression excluding palindromic SNPs. (k) Causal association of drinks per week and ACE2 expression excluding palindromic SNPs. (l) Causal association of smoking initiation and ACE2 expression excluding pleiotropic SNPs. (m) Causal association of cigarettes per day and ACE2 expression excluding pleiotropic SNPs. (n) Causal association of drinks per week and ACE2 expression excluding pleiotropic SNPs. (o) Causal association of cigarettes per day with the risk of COVID-19 related adverse outcomes. (p) Causal association of drinks per week with the risk of COVID-19 related adverse outcomes. (q) Causal association of smoking and alcohol consumption with the risk of COVID-19 related adverse outcomes excluding palindromic SNPs. (r) Causal association of smoking and alcohol consumption with the risk of COVID-19 related adverse outcomes excluding pleiotropic SNPs. [file elife-64188-supp1.xlsx]

## Sheet: SFile 1a Smk SNPs
Supplementary File 1a. Information of genome-wide significant SNPs associated with smoking initiation.
Chromosome	Position	SNP	Gene	Reference Allele	Effect Allele	Effect Allele Frequency	Beta	SE	p
1	7791461	rs12130857	Intron:CAMTA1	G	A	0.324968	-0.0180031	0.00272026	3.65e-11
1	8484823	rs301807	Intron:LOC102724552|RERE	A	G	0.57	0.0180144	0.00257349	2.5e-12
1	18436657	rs3820277	Intron:IGSF21	G	T	0.526	-0.0188369	0.00255159	1.57e-13
1	32195819	rs1889571	Intron:ADGRB2	T	G	0.131	0.0221798	0.00377614	4.19e-09
1	33795572	rs10914684	Intron:PHC2	G	A	0.324	-0.0158038	0.00272237	6.32e-09
1	38757237	rs2637869	Intergenic	G	A	0.297	0.0182201	0.00278829	6.54e-11
1	41776623	rs12755632	Intergenic	A	G	0.316	-0.0154051	0.00274045	1.93e-08
1	44011737	rs951740	Intron:PTPRF	G	A	0.625	0.0295409	0.00263171	3.82e-29
1	46496709	rs925524	Synonymous:MAST2	A	G	0.71	0.0155573	0.0028078	2.94e-08
1	50603995	rs12022778	Intron:ELAVL4	A	C	0.202	0.0268248	0.00317904	3.18e-17
1	50861071	rs11587399	Intergenic	A	T	0.221	-0.0178046	0.00307616	7.25e-09
1	58815243	rs4912332	Intergenic	C	T	0.491	0.0141209	0.00254855	2.94e-08
1	66469643	rs1937443	Intron:PDE4B	C	G	0.563	0.0204362	0.00256861	1.79e-15
1	71490122	rs1022528	Intron:PTGER3	G	A	0.344	0.0174022	0.00268202	8.48e-11
1	72752073	rs12740789	Intergenic	G	A	0.178	-0.0284973	0.00333079	1.18e-17
1	72900406	rs80054503	Intergenic	T	C	0.116	-0.0241377	0.0040742	3.1e-09
1	73824909	rs10789369	Intergenic	A	G	0.615	-0.0234484	0.00261834	3.39e-19
1	74991596	rs1514176	Intron:FPGT-TNNI3K|TNNI3K	G	A	0.58	-0.0193002	0.0025814	7.67e-14
1	76689019	rs10873871	Intron:ST6GALNAC3	A	G	0.207	0.0174521	0.00314465	2.82e-08
1	87913176	rs11162019	Intergenic	C	T	0.363	-0.0154947	0.00264954	5.06e-09
1	91189731	rs1008078	Intergenic	C	T	0.402	0.0228169	0.00259854	1.63e-18
1	96414335	rs1935571	Intergenic	T	G	0.48	-0.0157204	0.00255018	6.99e-10
1	154206358	rs12027999	Intron:UBAP2L	T	C	0.12	-0.0243588	0.00392068	5.33e-10
1	155034632	rs45444697	Intron:ADAM15|DCST1-AS1	C	G	0.212	0.0196901	0.00311718	2.72e-10
1	174104743	rs2901785	Intron:LOC102724601	G	A	0.446	-0.0173083	0.00256313	1.47e-11
1	179783167	rs147052174	Nonsynonymous:FAM163A	G	T	0.0171	0.0623094	0.00982745	2.3e-10
1	190957480	rs35656245	Intergenic	G	A	0.276	0.0159456	0.00285016	2.23e-08
1	210302043	rs12739243	Intron:SYT14	T	C	0.221	-0.0212518	0.00307064	4.45e-12
1	236872829	rs12563365	Intron:ACTN2	G	A	0.556	0.0165589	0.00256428	1.05e-10
1	237852083	rs876793	Intron:RYR2	T	C	0.349262	-0.0179245	0.00273664	5.69e-11
2	264621	rs114976176	Intron:SH3YL1	A	C	0.351571	-0.0155137	0.00266843	6.04e-09
2	417167	rs62106258	Intergenic	T	C	0.047329	-0.045498	0.0060001	3.33e-14
2	624205	rs6731872	Intergenic	T	G	0.826	0.0315977	0.00336069	5.35e-21
2	22067213	rs1022376	Intergenic	T	C	0.515821	-0.0147448	0.00261063	1.66e-08
2	22582968	rs61533748	Intergenic	T	C	0.384	0.0174357	0.00261962	2.82e-11
2	29513404	rs72790288	Intron:ALK	G	A	0.0282	-0.0455318	0.00769628	3.28e-09
2	32808804	rs2710634	Intron:BIRC6	T	C	0.521	-0.0177614	0.00255039	3.36e-12
2	44250149	rs62137126	Intergenic	A	G	0.121094	-0.0236911	0.00390536	1.31e-09
2	45159091	rs1004787	Intron:LINC01833	G	A	0.552	0.0284143	0.00256204	1.11e-28
2	50735943	rs7598402	Intron:NRXN1	C	G	0.492084	-0.0147283	0.00254846	7.38e-09
2	51341259	rs10490159	Intron:LOC730100	C	T	0.394	0.0172365	0.00260741	3.86e-11
2	58171220	rs1518393	Intron:VRK2	A	C	0.619	0.0168601	0.00262353	1.3e-10
2	59022210	rs17616642	Intron:LINC01122	A	G	0.24687	-0.0165573	0.00295478	2.1e-08
2	59315828	rs6730325	Intergenic	G	A	0.609782	-0.0146358	0.00261188	2.1e-08
2	59819545	rs2539706	Intergenic	G	A	0.529947	0.0162454	0.00255272	1.95e-10
2	60024857	rs7585579	Intergenic	C	G	0.499	0.0203962	0.00260932	5.48e-15
2	60139524	rs1863161	Intergenic	G	A	0.56094	0.0153394	0.00256728	2.34e-09
2	60477052	rs359247	Intergenic	A	T	0.638652	0.0220304	0.00265215	9.89e-17
2	63416606	rs62180324	Intron:WDPCP	G	A	0.212	-0.0195167	0.00311718	3.91e-10
2	80748807	rs6750107	Intron:CTNNA2	G	A	0.386875	0.0145651	0.00261598	2.6e-08
2	80999398	rs12714017	Intergenic	T	C	0.511	0.0153965	0.00260995	3.65e-09
2	83247997	rs56208390	Intergenic	A	G	0.123	0.0215636	0.00387919	2.68e-08
2	98275354	rs11692435	Nonsynonymous:ACTR1B	G	A	0.0848	0.0250526	0.00458161	4.47e-08
2	100672408	rs13392222	Intron:AFF3	A	C	0.139	-0.0234375	0.00368286	1.93e-10
2	104126983	rs1901477	Intergenic	A	G	0.511	0.030437	0.00260995	2.07e-31
2	104432494	rs11889814	Intergenic	A	C	0.128	-0.0210265	0.00381356	3.44e-08
2	113240183	rs3811038	Intron:TTL	T	C	0.279	0.0191404	0.00284069	1.58e-11
2	113246436	rs75210106	Intron:TTL	C	T	0.176676	-0.0186594	0.00334056	2.33e-08
2	137571174	rs34399632	Intron:THSD7B	A	G	0.232	0.0193504	0.00301835	1.46e-10
2	145412271	rs74697736	Intergenic	G	A	0.287239	0.0222963	0.00281579	2.43e-15
2	146140132	rs6756212	Intergenic	C	T	0.535	-0.033888	0.00255441	3.49e-40
2	146283610	rs3076896	Intergenic	G	A	0.38988	0.022646	0.00275434	1.99e-16
2	147825689	rs16826827	Intergenic	T	C	0.124	-0.0222069	0.00386572	9.17e-09
2	155682556	rs1445649	Intron:KCNJ3	T	C	0.538	0.0205716	0.00255553	8.48e-16
2	161816880	rs1722666	Intergenic	C	T	0.732	0.0160932	0.00287654	2.17e-08
2	162101261	rs11678980	Exon:LINC01806	G	A	0.45	0.0176689	0.00256098	5.19e-12
2	162802993	rs12474587	Intron:SLC4A10	G	T	0.429	0.0242306	0.00257423	4.83e-21
2	164862639	rs357304	Intergenic	T	C	0.727	0.0166757	0.00285986	5.4e-09
2	166250244	rs13007361	Intergenic	G	A	0.208	0.0175338	0.00313906	2.29e-08
2	172521827	rs7600835	Intergenic	G	A	0.342	-0.0151216	0.00268576	1.8e-08
2	182027603	rs6750529	Intron:LINC01934	C	T	0.744	0.0199074	0.00291936	9.26e-12
2	199523122	rs17229285	Intergenic	C	T	0.505	-0.0154796	0.00254827	1.27e-09
2	200936399	rs3115418	Intergenic	T	C	0.454	-0.0142249	0.00255899	2.79e-08
2	202843875	rs62193862	Intergenic	G	A	0.0999	0.0238463	0.00424879	1.99e-08
2	225365635	rs4674916	Intron:CUL3	C	A	0.327671	-0.0180261	0.00271446	3.06e-11
2	226332033	rs4674993	Intron:NYAP2	A	G	0.2	-0.0240053	0.00318518	4.85e-14
3	2365026	rs11713899	Intron:CNTN4	A	C	0.171	0.0187188	0.00338391	3.15e-08
3	16851202	rs748832	Intergenic	A	G	0.371	0.0172142	0.00263743	6.6e-11
3	25725501	rs10446419	Intergenic	A	G	0.207	-0.0195626	0.00314465	5.05e-10
3	47800216	rs13319205	Intron:SMARCC1	T	A	0.29	0.0165398	0.0028078	3.77e-09
3	48731487	rs3172494	Utr3:IP6K2	G	T	0.115	-0.0291267	0.00400086	3.4e-13
3	50192760	rs2526390	Intron:SEMA3F|SEMA3F-AS1	C	T	0.334	0.0204663	0.00270136	3.62e-14
3	52886605	rs2276825	Intron:STIMATE|TMEM110-MUSTN1	T	C	0.245	0.0188756	0.00296235	1.89e-10
3	53766212	rs2306866	Intron:CACNA1D	A	T	0.614	-0.0166755	0.00261707	1.89e-10
3	55988394	rs73831818	Intron:ERC2	A	G	0.057	0.0320435	0.00549541	5.46e-09
3	59434420	rs1910236	Intergenic	G	A	0.469	0.0146439	0.00255305	9.91e-09
3	59966156	rs7640107	Intron:FHIT	C	T	0.430789	-0.014186	0.00257291	3.46e-08
3	60459291	rs2734390	Intron:FHIT	A	G	0.372	0.0147709	0.00263598	2.09e-08
3	64234307	rs221988	Intergenic	A	C	0.384	-0.014865	0.00261962	1.43e-08
3	70890288	rs2196356	Intergenic	G	C	0.288886	-0.0187728	0.002811	2.45e-11
3	71064431	rs11128203	Intron:FOXP1	T	A	0.53	0.020406	0.00255274	1.29e-15
3	71483084	rs62246017	Intron:FOXP1	G	A	0.322639	-0.0161695	0.00272537	3.03e-09
3	74954560	rs4543050	Intergenic	A	T	0.816	0.0222035	0.00328806	1.45e-11
3	77176032	rs6782116	Intron:ROBO2	C	T	0.415	-0.0146502	0.00258578	1.46e-08
3	81325861	rs13066050	Intergenic	C	T	0.208	0.0188343	0.00313906	1.93e-09
3	83241365	rs12633090	Intergenic	G	C	0.182	-0.0230197	0.00330203	3.16e-12
3	85460131	rs1549979	Intron:CADM2	C	T	0.615	-0.0245223	0.00262304	8.8e-21
3	85475292	rs74664784	Intron:CADM2	T	C	0.376	-0.0199109	0.00278808	9.34e-13
3	85902536	rs57153235	Intron:CADM2	T	G	0.318	-0.01938	0.00274074	1.56e-12
3	107997514	rs6437769	Intergenic	C	T	0.581	0.0142141	0.00258225	3.74e-08
3	114147927	rs9288999	Intron:ZBTB20	G	A	0.735	0.0174411	0.00288687	1.5e-09
3	117822149	rs6438436	Intergenic	C	T	0.816	0.024737	0.00328806	5.33e-14
3	118302515	rs12053870	Intron:LOC105374060	T	G	0.541511	0.0156164	0.00255697	1.02e-09
3	131945722	rs9826984	Intergenic	G	A	0.542	-0.0140529	0.00255718	3.87e-08
3	147106319	rs2279829	Utr3:ZIC4	C	T	0.216	-0.0173766	0.00309606	2.05e-08
3	147719648	rs2319545	Intergenic	C	A	0.149099	0.0232366	0.00357698	8.3e-11
3	149543102	rs10935779	Intron:RNF13	C	T	0.415	-0.0143272	0.00258578	2.95e-08
3	157393770	rs963354	Intergenic	C	A	0.687	0.0150489	0.00274753	4.21e-08
3	158284861	rs1714521	Intron:LOC100996447	A	C	0.411	-0.0162953	0.00258949	3.07e-10
3	159048333	rs1449012	Intron:IQCJ-SCHIP1|SCHIP1	C	T	0.463	-0.0153734	0.00255515	1.77e-09
3	161761866	rs9850597	Intergenic	G	A	0.816	-0.018571	0.00328806	1.65e-08
3	173072584	rs1187820	Intergenic	C	T	0.439	-0.0142712	0.00256732	2.69e-08
3	173353739	rs16828799	Intron:NLGN1	G	T	0.156	0.0197692	0.00351124	1.83e-08
3	175718927	rs9841807	Intergenic	C	T	0.273	0.0162535	0.00285986	1.35e-08
3	181409057	rs7631379	Intron:SOX2-OT	T	C	0.206	0.0208014	0.00315028	3.94e-11
4	15458598	rs4140932	Intergenic	T	A	0.431	-0.0140445	0.00257276	4.89e-08
4	28027176	rs12642744	Intergenic	G	T	0.744	-0.0165908	0.00298945	2.82e-08
4	28246049	rs59537158	Intergenic	C	T	0.214	0.0224875	0.00310653	4.62e-13
4	28822284	rs1389171	Intergenic	T	A	0.241	-0.017472	0.00297896	4.45e-09
4	29082156	rs55944129	Intergenic	T	C	0.267	-0.0175654	0.00287996	1.06e-09
4	31184484	rs58400863	Intron:LINC02497	G	A	0.347	-0.0201719	0.00267653	4.89e-14
4	35501032	rs7657022	Intergenic	A	G	0.489	0.0182908	0.00254876	7.34e-13
4	35514712	rs55900829	Intergenic	A	T	0.334806	0.0191319	0.00277595	5.63e-12
4	68017710	rs112725451	Intergenic	C	T	0.169	0.026092	0.00339977	1.65e-14
4	94052854	rs1160685	Intron:GRID2	C	G	0.45	0.0153017	0.00256098	2.31e-09
4	94550450	rs1435479	Intron:GRID2	G	T	0.28748	0.0163905	0.00281508	5.68e-09
4	112467612	rs3934797	Intergenic	G	A	0.182	-0.0212975	0.00330203	1.12e-10
4	136406155	rs71602617	Intergenic	C	T	0.216	-0.0177655	0.00317039	2.1e-08
4	137474783	rs7696257	Intergenic	G	A	0.366	0.0153313	0.00264489	6.78e-09
4	140886963	rs13109980	Intron:MAML3	G	A	0.326	-0.0221816	0.00271803	3.37e-16
4	143510148	rs1116690	Intron:INPP4B	A	G	0.742	0.0162912	0.00291194	2.16e-08
4	147797913	rs13110073	Intron:TTC29	T	C	0.395	-0.0246426	0.00260626	3.24e-21
4	147985231	rs28717373	Intergenic	C	T	0.356165	-0.0164657	0.00266061	6.16e-10
4	176875795	rs62340589	Intron:GPM6A	G	C	0.201	0.0174134	0.00317923	4.31e-08
5	30842054	rs12517438	Intergenic	T	G	0.538	0.0153545	0.00255553	1.89e-09
5	43190647	rs35375873	Intergenic	G	C	0.11	-0.0270102	0.00407195	3.29e-11
5	50821338	rs986714	Intergenic	A	T	0.445	-0.0160308	0.0025637	4.13e-10
5	60121271	rs71592686	Intron:ELOVL7	T	C	0.274	0.0207374	0.0028566	3.85e-13
5	79308315	rs2028269	Intron:THBS4	G	A	0.399	0.0161645	0.00260178	5.19e-10
5	80263865	rs6874731	Intron:RASGRF2	T	G	0.484	0.0153179	0.00254945	1.83e-09
5	87685500	rs6452785	Intron:TMEM161B-AS1	C	T	0.474	-0.0268827	0.00255159	4.69e-26
5	88873832	rs10805858	Intergenic	A	T	0.335286	0.0181241	0.00269879	1.88e-11
5	91366274	rs181508347	Intergenic	T	G	0.00965	0.0810758	0.0130327	4.95e-10
5	94198290	rs42417	Intron:MCTP1	C	T	0.691	0.0169296	0.00275724	8.27e-10
5	103929588	rs72780746	Intergenic	T	C	0.173	-0.025763	0.00336835	2.05e-14
5	106455988	rs10060196	Intergenic	C	A	0.580606	0.0183116	0.00258191	1.29e-12
5	106825618	rs72789626	Intron:EFNA5	T	A	0.136	-0.0256431	0.00371678	5.13e-12
5	107365642	rs17165769	Intron:FBXL17	A	G	0.394872	0.0159396	0.0026064	9.56e-10
5	133865452	rs329124	Intron:JADE2	A	G	0.428	-0.0163871	0.00257498	1.96e-10
5	154839646	rs1385108	Intergenic	C	T	0.239	0.0187045	0.00298746	3.84e-10
5	157707571	rs1173461	Intergenic	C	T	0.327	0.0166092	0.00271589	9.51e-10
5	161018271	rs11956866	Intergenic	T	G	0.567	-0.0148382	0.00257133	7.82e-09
5	165096435	rs3909281	Intergenic	T	G	0.536	0.0210672	0.00255477	1.62e-16
5	165427280	rs3843905	Intergenic	C	T	0.403	-0.0151458	0.00259749	5.41e-09
5	166063680	rs79476395	Intergenic	A	G	0.0726	0.0333743	0.00491012	1.04e-11
5	166778503	rs6890961	Intron:TENM2	C	T	0.624	-0.0193109	0.00263031	2.13e-13
5	166989513	rs4044321	Intron:TENM2	A	G	0.644	-0.022641	0.00266088	1.75e-17
5	167614971	rs2173019	Intron:TENM2	T	A	0.177	0.028207	0.00333816	2.98e-17
5	170299916	rs10042827	Intron:RANBP17	T	C	0.681	0.0167171	0.00273354	9.41e-10
5	173288534	rs359431	Intergenic	C	T	0.56	-0.0141982	0.00256669	3.16e-08
6	26171250	rs1059490	Utr3:HIST1H2BD	T	C	0.367	-0.0185935	0.00264813	2.16e-12
6	26571629	rs6932350	Intron:LOC105374988	T	A	0.454655	0.0149684	0.00256329	5.13e-09
6	28129789	rs1150668	Intron:ZNF192P1	T	G	0.419	-0.0185103	0.00258689	8.54e-13
6	29796685	rs1632941	Intron:HLA-G	T	C	0.46	-0.0158074	0.00256093	6.67e-10
6	41901763	rs3218116	Intergenic	C	T	0.256	-0.019843	0.00291936	1.05e-11
6	52895230	rs160631	Intron:ICK	T	G	0.731	-0.0172628	0.00287315	1.87e-09
6	67521222	rs7743165	Intergenic	T	G	0.495	0.0192559	0.00254827	4.15e-14
6	67540984	rs79180767	Intergenic	C	T	0.253	0.0200919	0.00293071	7e-12
6	69470709	rs10945141	Intron:ADGRB3	G	A	0.263	0.0181417	0.00289389	3.59e-10
6	92226609	rs17554906	Intergenic	G	C	0.444	0.0141849	0.00256428	3.14e-08
6	94175279	rs619087	Intergenic	A	G	0.422	0.0142703	0.00257973	3.1e-08
6	97702876	rs6568832	Intron:MIR548H3|MMS22L	G	A	0.753851	0.018869	0.00295768	1.74e-10
6	98636905	rs12195240	Intergenic	G	A	0.285	0.0249108	0.0028224	1.08e-18
6	100347745	rs6936160	Intergenic	C	T	0.698	0.0201068	0.002775	4.2e-13
6	101329173	rs12530388	Utr5:ASCC3	A	C	0.511	-0.0183617	0.00254876	5.83e-13
6	108994161	rs3800227	Intron:FOXO3	A	G	0.742	0.017178	0.00291194	3.64e-09
6	111658371	rs118202	Intron:REV3L	G	T	0.812	-0.0367484	0.00326089	1.9e-29
6	156431856	rs73008357	Intergenic	A	C	0.121	-0.0223095	0.00400046	2.44e-08
6	157738258	rs9331343	Intron:TMEM242	T	C	0.568	-0.0141345	0.00257204	3.9e-08
6	158882320	rs10698713	Intron:TULP4	G	A	0.0544	-0.033517	0.00561747	2.38e-09
6	163807748	rs1737329	Intergenic	C	G	0.742	0.0170292	0.00291194	5.08e-09
7	1703675	rs10272990	Intergenic	T	C	0.327622	-0.0209215	0.00271457	1.27e-14
7	1870794	rs6948707	Intron:MAD1L1	T	G	0.419	0.0243472	0.00258225	4.24e-21
7	3329967	rs10259715	Intergenic	T	A	0.209918	-0.0186739	0.00321678	6.42e-09
7	3503207	rs13237637	Intron:SDK1	G	C	0.485	-0.0236823	0.00254929	1.54e-20
7	69432311	rs79631993	Intron:AUTS2	A	C	0.216281	-0.0170343	0.0030946	3.67e-08
7	69484366	rs7809303	Intron:AUTS2	G	A	0.325	-0.0214188	0.0027202	3.48e-15
7	77771983	rs7802996	Intron:MAGI2	C	T	0.166	-0.0208847	0.00342418	1.06e-09
7	78139581	rs1030015	Intron:MAGI2	G	T	0.519564	0.0142896	0.00255009	2.15e-08
7	88442568	rs4727189	Intron:ZNF804B	T	C	0.344	0.0148604	0.00268202	3e-08
7	91281409	rs76841737	Intergenic	C	G	0.103	-0.0231488	0.00419159	3.26e-08
7	96629103	rs11768481	Intron:DLX6-AS1	C	A	0.34	-0.0185561	0.00268957	5.23e-12
7	97707069	rs1799068	Intergenic	G	T	0.379	0.0166096	0.0026262	2.59e-10
7	99071478	rs13437771	Intron:ZNF789	A	G	0.155	-0.0271098	0.00352046	1.39e-14
7	111100585	rs11766326	Intron:IMMP2L	T	C	0.506	-0.017544	0.00260951	1.79e-11
7	114940159	rs6968380	Intergenic	G	A	0.681	-0.0234192	0.00273354	1.05e-17
7	115077394	rs112913817	Intergenic	A	G	0.011318	0.0780558	0.0120443	9.28e-11
7	117523709	rs10233018	Intergenic	A	G	0.516	0.0246124	0.00254945	4.77e-22
7	121954709	rs10953957	Intergenic	G	A	0.386	0.0144058	0.00261707	3.66e-08
7	132593831	rs77283305	Intron:CHCHD3	G	A	0.305819	-0.015196	0.00276519	3.91e-08
7	133589846	rs10279261	Intron:EXOC4	G	A	0.618	-0.0188726	0.00262221	6.05e-13
7	133840652	rs1561112	Intron:LRGUK	T	C	0.412815	-0.0152438	0.00258779	3.84e-09
8	10143164	rs2952251	Intron:MSRA	A	G	0.74437	0.0164125	0.0029965	4.24e-08
8	10763655	rs4326350	Intron:XKR6	C	G	0.493	-0.0176137	0.00255297	5.16e-12
8	27344719	rs11780471	Intergenic	G	A	0.063121	-0.0386779	0.0052392	1.57e-13
8	27425349	rs11783093	Intergenic	C	T	0.158	-0.0471243	0.00349308	2.07e-41
8	27426077	rs1565735	Intergenic	T	A	0.204463	-0.0191637	0.00315905	1.33e-09
8	52569449	rs7836565	Intron:PXDNL	C	T	0.718	-0.0155084	0.00283144	4.36e-08
8	59814666	rs13261666	Intron:TOX	G	T	0.517	-0.0199946	0.00254962	4.36e-15
8	64912021	rs3850736	Intron:LOC102724623	C	G	0.474	0.0191284	0.00255159	6.43e-14
8	91096366	rs2063976	Intergenic	C	T	0.664955	-0.0201814	0.00269927	7.45e-14
8	92733282	rs6993429	Intergenic	C	A	0.453	-0.0190505	0.00255947	9.87e-14
8	93048104	rs6986430	Intron:RUNX1T1	T	C	0.222377	-0.0243377	0.00306383	1.99e-15
8	93190014	rs9987376	Intergenic	T	G	0.574251	-0.0204682	0.00257671	2.01e-15
8	115374642	rs290601	Intergenic	C	T	0.274	0.0163102	0.0028566	1.14e-08
9	3025368	rs3847244	Intergenic	C	T	0.47	0.0186717	0.00255274	2.6e-13
9	3398679	rs11791671	Intron:RFX3	C	T	0.067315	0.0278504	0.00508476	4.24e-08
9	8282399	rs7024924	Intergenic	T	C	0.174	0.0188918	0.00336069	1.9e-08
9	10981069	rs6474609	Intergenic	T	A	0.586731	-0.0155887	0.00258736	1.71e-09
9	11161799	rs1931431	Intergenic	G	C	0.478	0.0182329	0.00255061	8.56e-13
9	20676454	rs7867822	Intron:FOCAD	A	G	0.673	-0.015097	0.00271589	2.76e-08
9	23831658	rs10966092	Intron:ELAVL2	T	C	0.267	-0.0204862	0.00287996	1.12e-12
9	29747488	rs10969352	Intergenic	T	A	0.5	0.0143467	0.00254814	1.82e-08
9	81354129	rs4877285	Intergenic	G	A	0.668249	-0.0181318	0.00270594	2.1e-11
9	81444104	rs1930371	Intergenic	C	T	0.241	-0.017242	0.00297896	7.09e-09
9	86707289	rs2378662	Intron:LOC101927575	G	A	0.541	0.0152121	0.00255675	2.67e-09
9	120519111	rs1927901	Intergenic	T	C	0.553	-0.0141755	0.00256258	3.1e-08
9	122061948	rs4837631	Intron:BRINP1	C	T	0.446	-0.0153574	0.00256313	2.03e-09
9	128073097	rs1759433	Intron:GAPVD1	G	A	0.48	0.0153647	0.00255018	1.69e-09
9	134334588	rs34553878	Nonsynonymous:PRRC2B	A	G	0.111	0.0246707	0.00405584	1.17e-09
9	134907263	rs7026534	Intron:MED27	T	G	0.703821	-0.016603	0.00279052	2.68e-09
9	137989785	rs10858334	Utr3:OLFM1	C	G	0.14	0.022871	0.00375997	1.18e-09
10	8803551	rs10905461	Intergenic	T	C	0.748	-0.0163915	0.00293456	2.36e-08
10	10043159	rs7920501	Intergenic	T	A	0.465	-0.0155168	0.00255441	1.25e-09
10	11133823	rs1291821	Intron:CELF2|CELF2-AS2	A	G	0.534	0.014493	0.00255405	1.39e-08
10	13533053	rs11258417	Intron:BEND7	C	T	0.391	-0.0145136	0.00261094	2.71e-08
10	22032942	rs7072776	Intergenic	A	G	0.712	-0.0219747	0.00281357	5.66e-15
10	36634124	rs2796793	Intergenic	G	A	0.452	0.0144814	0.00255997	1.55e-08
10	56698174	rs1733760	Intron:PCDH15	T	C	0.51	0.0147734	0.00254865	6.7e-09
10	63674885	rs7921378	Intron:ARID5B	G	C	0.482	-0.0233135	0.00254979	6.1e-20
10	103186838	rs7901883	Intron:BTRC	G	A	0.230322	-0.0192575	0.00302602	1.98e-10
10	103960351	rs11594623	Intergenic	T	C	0.234241	0.0274396	0.00300827	7.45e-20
10	104120522	rs11191269	Intron:GBF1	C	G	0.193294	0.0176426	0.00322646	4.61e-08
10	104403310	rs28408682	Intergenic	A	G	0.600019	0.0166729	0.00260071	1.41e-10
10	104640052	rs12244388	Intron:AS3MT|BORCS7-ASMT	G	A	0.35	0.0258153	0.00267118	4.31e-22
10	104852121	rs111842178	Intron:NT5C2	A	G	0.231008	0.0224527	0.00319775	2.24e-12
10	106078937	rs34970111	Intron:ITPRIP	C	T	0.458	-0.0145557	0.00255718	1.28e-08
10	106460460	rs9787523	Intron:SORCS3	T	C	0.418	-0.0156273	0.00258312	1.42e-09
10	106929313	rs11192347	Intron:SORCS3	G	A	0.104	-0.02645	0.00427392	6.15e-10
10	115378364	rs10885480	Intron:NRAP	T	C	0.284	-0.0186775	0.00282539	3.83e-11
10	118678712	rs4752018	Intron:SHTN1	C	A	0.231	0.0188538	0.0030229	4.42e-10
10	125680419	rs9423279	Intergenic	C	G	0.645	-0.0185808	0.00266256	3.06e-12
11	27679916	rs6265	Nonsynonymous:BDNF	C	T	0.188	-0.0292755	0.00326089	2.81e-19
11	28652996	rs4275621	Intergenic	A	G	0.382	-0.0213674	0.00262221	3.76e-16
11	32956492	rs62618693	Nonsynonymous:QSER1	C	T	0.0428	-0.0352724	0.00629463	2.09e-08
11	41436297	rs2939756	Intron:LRRC4C	G	A	0.48	-0.0156997	0.00255018	7.45e-10
11	42442826	rs1381775	Intergenic	T	C	0.712	-0.0156147	0.00281357	2.79e-08
11	46078656	rs2959084	Intron:PHF21A	G	A	0.704674	0.0170799	0.00279286	9.82e-10
11	46393574	rs3740977	Intron:DGKZ	T	C	0.167	0.019474	0.00341596	1.17e-08
11	64133552	rs61886926	Intron:RPS6KA4	C	T	0.384	-0.0179401	0.00261962	7.3e-12
11	64485193	rs61884449	Intron:NRXN2	C	T	0.149183	0.0199753	0.00357615	2.32e-08
11	65561468	rs644740	Intron:OVOL1	C	T	0.457	-0.0140785	0.00255762	3.67e-08
11	73309393	rs7943721	Intergenic	G	A	0.829	-0.0212136	0.00338391	3.58e-10
11	85980958	rs7929518	Intron:EED	A	G	0.773	0.0192363	0.00304152	2.55e-10
11	92289734	rs586699	Intron:FAT3	G	A	0.543	-0.0148033	0.00255762	7.29e-09
11	111979741	rs76460663	Intergenic	C	G	0.041056	-0.04235	0.00642109	4.15e-11
11	112912811	rs2155646	Intron:NCAM1	T	C	0.4	0.0377772	0.00260069	9.44e-48
11	112984491	rs78239456	Intron:NCAM1	A	T	0.376527	-0.0184952	0.00271227	9.37e-12
11	113660576	rs1713676	Intergenic	A	G	0.522512	-0.0167262	0.00255073	5.38e-11
11	113994505	rs238896	Intron:ZBTB16	G	A	0.49	-0.0168674	0.00254865	3.65e-11
11	121530888	rs540860	Intergenic	A	G	0.543	0.0176086	0.00255762	5.75e-12
11	121634334	rs1944689	Intergenic	G	T	0.785911	0.01768	0.00310606	1.27e-08
11	122023187	rs1834306	Intron:MIR100HG	A	G	0.579399	-0.0144852	0.00258089	1.96e-08
11	131966264	rs1106363	Intron:NTM	C	T	0.344579	0.0173746	0.00268095	9.2e-11
11	132098205	rs2010921	Intron:NTM	G	A	0.311	0.0174291	0.00275235	2.47e-10
12	16748721	rs11057005	Intron:LMO3	A	G	0.441	-0.0157139	0.00256607	9.12e-10
12	49952394	rs13906	Utr3:MCRS1	C	T	0.109	-0.0245297	0.00408829	1.98e-09
12	56474480	rs4759229	Intron:ERBB3	A	G	0.656	0.0155696	0.00268202	6.53e-09
12	69655167	rs7969559	Intron:CPSF6	A	G	0.713	-0.0170159	0.00281649	1.53e-09
12	75263193	rs7134009	Intergenic	T	C	0.287	-0.0157969	0.00288411	4.3e-08
12	112618346	rs77215829	Intron:HECTD4	A	C	0.131	-0.0240447	0.00378293	2.02e-10
12	121083279	rs1109480	Intron:CABP1	G	A	0.384	-0.0166917	0.00261962	1.84e-10
12	133380790	rs11611651	Intron:GOLGA3	G	A	0.0868	0.0271143	0.00452534	2.05e-09
13	38172867	rs17197663	Utr5:POSTN	G	A	0.125	-0.0215874	0.00385243	2.06e-08
13	38359676	rs4264267	Intron:TRPC4	C	T	0.527042	0.0147921	0.00255188	6.82e-09
13	55834929	rs61959481	Intergenic	G	A	0.21	-0.0203442	0.00312803	7.95e-11
13	55931424	rs3098272	Intergenic	A	C	0.798794	-0.0178082	0.00317801	2.08e-08
13	59265043	rs9538162	Intergenic	T	C	0.415874	0.0173792	0.00258499	1.76e-11
13	59339281	rs1413119	Intergenic	C	T	0.396318	-0.0152551	0.00260476	4.77e-09
13	59454139	rs56367474	Intergenic	C	T	0.304	-0.0172975	0.00276982	4.2e-10
13	59871584	rs55786907	Intergenic	A	G	0.162492	0.0194452	0.00345369	1.84e-08
13	60705792	rs4886207	Intron:DIAPH3	T	C	0.637	-0.0162467	0.00264954	8.78e-10
13	66949370	rs9540731	Intron:PCDH9	C	T	0.509	-0.0177303	0.00254855	3.42e-12
13	80191873	rs9545155	Intergenic	T	C	0.478	-0.0160709	0.00255061	3.04e-10
13	81191176	rs1772572	Intergenic	C	A	0.324132	-0.0168681	0.00272209	5.62e-10
13	96823724	rs75674569	Intron:HS6ST3	G	A	0.0997	-0.0253377	0.00425258	2.58e-09
13	100546450	rs7333559	Intron:CLYBL|LOC101927437	G	A	0.783	-0.0232125	0.00309089	5.94e-14
13	100648356	rs1108130	Exon:LINC00554	T	A	0.212	0.0239436	0.00311718	1.57e-14
13	101252635	rs12855717	Intergenic	C	T	0.538	0.0155237	0.00255553	1.22e-09
14	28346502	rs12878369	Intergenic	C	A	0.414762	0.0174373	0.00258792	1.6e-11
14	29316842	rs2145451	Intergenic	T	C	0.193	-0.0200462	0.00323073	5.44e-10
14	58653514	rs9323328	Intergenic	A	G	0.537	-0.014237	0.00255705	2.55e-08
14	77529375	rs1811739	Intron:LINC02288	G	A	0.248	0.0182718	0.00295244	5.97e-10
14	79563654	rs8005334	Intron:NRXN3	T	G	0.36	0.0166734	0.00265629	3.44e-10
14	80102233	rs34940743	Intron:NRXN3	A	G	0.346	0.0159249	0.00268034	2.8e-09
14	98362355	rs2925128	Intergenic	C	T	0.385191	0.0168199	0.00268304	3.67e-10
14	98597552	rs1381287	Intergenic	C	T	0.467	0.0180166	0.00255561	1.81e-12
14	99693843	rs55913542	Intron:BCL11B	G	T	0.175	0.0185623	0.0033556	3.25e-08
15	36399479	rs1435672	Intergenic	T	C	0.56	0.0141051	0.00256669	3.82e-08
15	47685010	rs281296	Intron:SEMA6D	G	A	0.357	0.0246892	0.00265922	1.59e-20
15	47935843	rs1435741	Intron:SEMA6D	G	A	0.432951	0.0183091	0.00257137	1.09e-12
15	63898709	rs56902655	Intergenic	T	G	0.136	-0.0218628	0.00371678	4.09e-09
15	67476952	rs2289791	Intron:SMAD3	G	T	0.247	-0.0177255	0.00295425	2.01e-09
15	74048768	rs60833441	Intergenic	A	G	0.461	-0.0142766	0.00255593	2.28e-08
15	78025464	rs62007780	Intron:LINGO1	G	T	0.416	-0.0159133	0.00258488	7.48e-10
15	83893243	rs12442563	Intergenic	G	T	0.223	-0.0232296	0.00306077	3.13e-14
15	96858409	rs4310804	Intron:NR2F2-AS1	C	G	0.247	-0.0181873	0.00295425	7.55e-10
15	99204101	rs8027457	Intron:IGF1R	T	C	0.511	0.0153138	0.00254876	1.88e-09
16	720986	rs1139897	Nonsynonymous:RHOT2	G	A	0.23	-0.0240872	0.0030275	1.77e-15
16	5811367	rs11076962	Intergenic	T	C	0.279	0.0182999	0.00284069	1.2e-10
16	10173748	rs7192140	Intron:GRIN2A	T	C	0.498	-0.0168834	0.00254816	3.4e-11
16	17570220	rs9922607	Intergenic	C	T	0.2	-0.0221593	0.00318518	3.42e-12
16	18050926	rs9941217	Intergenic	C	G	0.352204	-0.0185567	0.00266733	3.5e-12
16	24727064	rs7188873	Intron:TNRC6A	A	G	0.612998	0.0202958	0.00261582	8.46e-15
16	25351633	rs6497840	Intergenic	G	A	0.707	0.0227703	0.00286651	2.01e-15
16	49766772	rs4785187	Intron:ZNF423	G	A	0.223	0.0199772	0.00306077	6.55e-11
16	49891964	rs8050598	Intergenic	C	T	0.254117	0.0186698	0.00292645	1.76e-10
16	50945156	rs12918191	Intergenic	A	G	0.243	-0.019727	0.00297059	3.14e-11
16	69576894	rs9302604	Intergenic	A	G	0.435	0.0187095	0.00256995	3.29e-13
16	72230694	rs9936784	Intergenic	T	G	0.53418	0.0139895	0.00255412	4.33e-08
16	72574550	rs62052916	Intron:LINC01572	A	T	0.0701	-0.0319138	0.00499018	1.62e-10
16	72950468	rs4788676	Intron:ZFHX3	T	C	0.228528	-0.017745	0.00303434	4.92e-09
16	75620118	rs61537885	Intergenic	T	C	0.037215	-0.0400626	0.00694251	8.06e-09
16	75766873	rs117657830	Intergenic	A	G	0.0417	-0.0377597	0.00637345	3.18e-09
16	87443734	rs1050847	Utr3:ZCCHC14	C	T	0.559	-0.01483	0.00256607	7.37e-09
16	89608702	rs11642231	Intron:SPG7	G	A	0.369	-0.0155983	0.00264038	3.44e-09
17	1995177	rs4790874	Intron:SMG6	C	T	0.532	0.0174491	0.00255338	8.43e-12
17	7795972	rs11078713	Intron:CHD3	A	G	0.419348	-0.0145829	0.00258195	1.59e-08
17	7803118	rs28441558	Intron:CHD3	T	C	0.0563	-0.035565	0.00552742	1.24e-10
17	16235462	rs11651955	Intergenic	G	A	0.499	-0.0140264	0.00254815	3.74e-08
17	27323322	rs67777803	Intron:SEZ6	G	T	0.172	-0.0246015	0.00337609	3.18e-13
17	30685935	rs2344976	Intron:ZNF207	T	C	0.612	-0.0150877	0.00261458	7.98e-09
17	37824339	rs3764351	Intron:PNMT	G	A	0.657	-0.0147492	0.00268388	3.89e-08
17	44121579	rs72836318	Intron:KANSL1	T	C	0.246	-0.0171223	0.00295829	7e-09
17	44793283	rs17692129	Intron:NSF	C	T	0.331	0.0195989	0.00270749	4.57e-13
17	50193197	rs75919030	Intron:CA10	T	C	0.267	-0.0209664	0.00287996	3.35e-13
17	50243397	rs2938134	Intergenic	C	A	0.673	-0.017501	0.00278109	3.14e-10
17	77790135	rs2587507	Intergenic	T	C	0.502	-0.0146602	0.00254816	8.69e-09
18	5872472	rs34342129	Intergenic	T	C	0.509	-0.014281	0.00254855	2.13e-08
18	25253297	rs4476253	Intergenic	G	A	0.24	-0.0184862	0.00298319	5.78e-10
18	31696075	rs7505855	Intron:NOL4	C	T	0.586	-0.0169818	0.00258669	5.31e-11
18	36921851	rs8096225	Intron:MIR924HG	A	C	0.703	0.0155245	0.00278829	2.63e-08
18	39297254	rs67050670	Intergenic	A	G	0.229	-0.0202723	0.00303214	2.34e-11
18	41314171	rs2359180	Intergenic	A	G	0.369	-0.0143894	0.00264038	4.98e-08
18	42658643	rs72898831	Intergenic	A	G	0.155	-0.0244159	0.00352046	4.14e-12
18	49874515	rs8083764	Intron:DCC	G	T	0.306171	-0.0159517	0.0027643	7.97e-09
18	49967811	rs1373178	Intron:DCC	T	G	0.588	-0.0203164	0.00258855	4.16e-15
18	50863861	rs62098013	Intron:DCC	G	A	0.365322	0.01771	0.00264593	2.24e-11
18	53661743	rs72938304	Intergenic	G	A	0.113	-0.0272051	0.00402432	1.36e-11
18	72535282	rs11872397	Intron:ZNF407	G	A	0.253	-0.0171139	0.00293071	5.2e-09
18	77574374	rs71367544	Intergenic	C	T	0.203	0.0205522	0.0031675	8.54e-11
19	4474725	rs76608582	Intron:HDGFL2	C	A	0.0489	-0.0345493	0.0059078	4.88e-09
19	4965064	rs10853981	Intergenic	G	A	0.33036	0.0147872	0.00270881	4.88e-08
19	18460956	rs113230003	Intron:PGPEP1	G	A	0.255	-0.0188761	0.00292311	1.05e-10
19	18566395	rs8103660	Intron:ELL	T	C	0.354431	0.0158026	0.00266352	3.03e-09
19	51129745	rs117734003	Intron:SYT3	G	C	0.0673	0.0302991	0.00508528	2.57e-09
19	55879872	rs1126757	Synonymous:IL11	C	T	0.473	0.0141623	0.00255187	2.92e-08
20	25195509	rs6050446	Nonsynonymous:ENTPD6	A	G	0.971	0.0544098	0.00761144	8.8e-13
20	29946968	rs6058782	Intergenic	C	T	0.908	0.0297103	0.00441915	1.78e-11
20	31175258	rs1555445	Upstream:NOL4L-DT	A	T	0.318	0.0187626	0.00274264	7.75e-12
20	42015801	rs6073075	Intergenic	T	A	0.824	-0.018704	0.00335394	2.44e-08
20	54462393	rs910912	Intergenic	T	C	0.739	-0.0167699	0.00290609	7.82e-09
20	61984317	rs6011779	Intron:CHRNA4	C	T	0.806	-0.0191766	0.00322763	2.83e-09
20	62406886	rs3810496	Intron:ZBTB46	T	C	0.619436	0.0158813	0.00262869	1.54e-09
21	40588819	rs4818005	Intron:BRWD1	G	A	0.581	-0.020431	0.00264425	1.09e-14
22	38397797	rs139896	Intron:POLR2F	T	C	0.648	0.0154404	0.00266769	7.14e-09
22	42698430	rs4822102	Intergenic	C	T	0.618	-0.0165428	0.00262221	2.78e-10
22	46442288	rs9627272	Intergenic	G	C	0.407	-0.0154737	0.0025934	2.42e-09

## Sheet: SFile 1b Cig SNPs
Supplementary File 1b. Information of genome-wide significant SNPs associated with cigrattes per day.
Chromosome	Position	SNP	Gene	Reference Allele	Effect Allele	Effect Allele Frequency	Beta	SE	p
1	35591626	rs11264100	Intergenic	A	G	0.876	-0.0221659	0.00370463	2.22e-09
1	154548521	rs2072659	Utr3:CHRNB2	C	G	0.0986	-0.0299842	0.00409553	2.51e-13
1	175993820	rs34973462	Intron:RFWD2	C	T	0.334	0.0150729	0.00258879	5.85e-09
2	60718347	rs7599488	Intron:BCL11A	C	T	0.437	0.0141213	0.00245448	8.95e-09
2	62710608	rs78408772	Intergenic	C	T	0.102	-0.0219964	0.00402269	4.51e-08
2	148372720	rs10204824	Intergenic	A	G	0.639	-0.0179777	0.00253484	1.35e-12
3	16872929	rs2084533	Intergenic	C	T	0.321	0.0161176	0.00260776	6.53e-10
3	48935583	rs7431710	Intron:SLC25A20	G	A	0.654	-0.0182898	0.00256612	1.04e-12
3	50421081	rs2236951	Intron:CACNA2D2	T	C	0.2	-0.0171906	0.00304365	1.59e-08
3	136224697	rs699165	Intron:STAG1	A	G	0.745	0.0161187	0.00279323	8.09e-09
3	158083918	rs28813180	Intron:RSRC1	G	A	0.498	-0.0154959	0.00243494	1.95e-10
4	3006043	rs1024323	Nonsynonymous:GRK4	C	T	0.382	-0.0144159	0.0025057	8.66e-09
4	67086288	rs11940255	Intergenic	G	A	0.717	-0.0171575	0.00270273	2.2e-10
4	67980830	rs10454798	Intergenic	G	T	0.253	0.015842	0.00280049	1.53e-08
6	26184102	rs7766641	Nonsynonymous:HIST1H2BE	G	A	0.272	-0.0172842	0.00274318	2.91e-10
7	32333642	rs215600	Intron:PDE1C	G	A	0.645	-0.0240025	0.00254426	4.02e-21
7	50339609	rs62447179	Intergenic	G	A	0.298	-0.0152678	0.00266182	9.68e-09
8	27418040	rs2741351	Intergenic	A	C	0.826	0.0184758	0.00321137	8.8e-09
8	27442127	rs73229090	Intergenic	C	A	0.112	0.0262114	0.00386046	1.14e-11
8	42442018	rs13253502	Intergenic	G	A	0.407	-0.0138423	0.00247817	2.31e-08
8	42578059	rs4236926	Intron:CHRNB3	T	G	0.766	0.0342671	0.00287563	7.66e-33
8	64604218	rs790564	Intergenic	A	C	0.729	-0.0176241	0.00273909	1.24e-10
9	136468701	rs75596189	Intergenic	C	T	0.112	0.0358005	0.00386046	1.84e-20
9	136502369	rs3025383	Intron:DBH	T	C	0.187	-0.0313798	0.0031224	9.78e-24
11	16377044	rs7951365	Intron:SOX6	T	C	0.31	0.0177564	0.00263239	1.53e-11
11	43667625	rs10742683	Intergenic	G	A	0.415	-0.0134884	0.00247089	4.83e-08
11	46737412	rs113001570	Intergenic	A	T	0.0667	0.0298013	0.00487957	1.04e-09
11	113436072	rs7125588	Intergenic	A	G	0.429	-0.0168997	0.00245985	6.5e-12
14	104184737	rs11846838	Intron:ZFYVE21	G	A	0.327	0.015177	0.00259522	5.03e-09
15	57141231	rs1115019	Intergenic	T	C	0.79	-0.0178594	0.00298904	2.27e-09
15	59155050	rs632811	Intergenic	A	G	0.33	-0.0177506	0.00277897	1.67e-10
15	78243579	rs4886550	Intergenic	A	G	0.288	-0.019931	0.00339821	4.58e-09
15	78812098	rs12438181	Intron:HYKK	G	A	0.218	-0.0185258	0.00297798	4.97e-10
15	78814046	rs10519203	Intron:HYKK	G	A	0.655	-0.093618	0.00258657	3.12e-286
15	78836288	rs28438420	Intron:PSMA4	A	T	0.554	0.0175609	0.00247361	1.25e-12
15	78849779	rs72740955	Intergenic	C	T	0.337	0.0317523	0.00260125	2.42e-34
15	78906177	rs146009840	Intron:CHRNA3	A	T	0.335	0.0221202	0.00260508	2e-17
15	78908565	rs28681284	Intron:CHRNA3	C	T	0.21	-0.0486763	0.00301878	2.1e-58
15	78911181	rs8040868	Synonymous:CHRNA3	T	C	0.4	0.016012	0.00250985	1.79e-10
15	79065171	rs3743063	Intron:ADAMTS7	A	C	0.562	-0.0167169	0.00247827	1.53e-11
15	89943601	rs182317	Intergenic	G	T	0.355	-0.0155878	0.00256957	1.31e-09
16	52093549	rs1592485	Intron:C16orf97	C	A	0.611	-0.0161532	0.00250445	1.11e-10
16	69552215	rs12924872	Intergenic	C	T	0.463	-0.0134119	0.00244867	4.39e-08
16	89756473	rs258321	Intron:CDK10	A	G	0.429	0.0157962	0.00246695	1.53e-10
18	53251725	rs4144686	Intron:TCF4	G	A	0.167	-0.0185513	0.00326418	1.35e-08
18	62125063	rs4485470	Intergenic	G	A	0.592	-0.0152706	0.00247722	7.05e-10
19	4044424	rs59208569	Utr3:ZBTB7A	G	C	0.829	0.0204763	0.00323355	2.45e-10
19	41338847	rs143200968	Intergenic	G	C	0.0251	-0.0861049	0.00786027	6.97e-28
19	41353107	rs56113850	Intron:CYP2A6	T	C	0.555	0.0523096	0.00247416	4.01e-99
19	41354496	rs8192726	Intron:CYP2A6	C	A	0.0679	-0.0393437	0.00488751	8.35e-16
19	41371480	rs117824460	Intergenic	A	G	0.026	-0.0952598	0.00772659	7.66e-35
20	11863500	rs6078373	Intergenic	G	A	0.402	0.0160731	0.00248308	9.4e-11
20	31054702	rs1737894	Intron:NOL4L	C	G	0.408	0.016856	0.00247722	9.9e-12
20	61986949	rs2273500	Intron:CHRNA4	T	C	0.147	0.0363857	0.00343813	3.49e-26
21	40520783	rs7281463	Intergenic	A	C	0.413	0.013678	0.00247264	3.15e-08

## Sheet: SFile 1c Drk SNPs
Supplementary File 1c. Information of genome-wide significant SNPs associated with drinks per week.
Chromosome	Position	SNP	Gene	Reference Allele	Effect Allele	Effect Allele Frequency	Beta	SE	p
1	4548453	rs705687	Intergenic	A	G	0.785	-0.010904	0.00177589	8.15e-10
1	33837334	rs58107686	Intron:PHC2	C	A	0.328	-0.00974713	0.00158537	7.79e-10
1	66407700	rs12088813	Intron:PDE4B	A	C	0.267	-0.00932905	0.00164916	1.58e-08
1	71491890	rs5024204	Intron:PTGER3	A	T	0.278	0.00970271	0.00162847	2.55e-09
1	165119792	rs10753661	Intergenic	G	A	0.684	-0.00863813	0.00156927	3.76e-08
1	173848808	rs28680958	Intron:ZBTB37	G	A	0.217	-0.0109965	0.00176994	5.13e-10
1	205719532	rs823114	Intergenic	G	A	0.553	0.00876774	0.00146742	2.31e-09
2	430975	rs77165542	Intergenic	C	T	0.0349	-0.0260109	0.00397125	5.63e-11
2	27730940	rs1260326	Nonsynonymous:GCKR	T	C	0.601	0.0208898	0.00148834	8.05e-45
2	27860551	rs2178197	Intron:GPN1	A	G	0.569083	-0.00878144	0.00147177	2.45e-09
2	45155276	rs13383034	Intron:LINC01833	C	T	0.329	0.014927	0.00155119	6.31e-22
2	45159091	rs1004787	Intron:LINC01833	G	A	0.550918	0.00844284	0.00146528	8.4e-09
2	63581507	rs13032049	Intron:WDPCP	A	G	0.283	0.0101945	0.00161798	3e-10
2	74334462	rs828867	Utr3:TET3	G	A	0.545	0.00875716	0.0014636	2.15e-09
2	98275354	rs11692435	Nonsynonymous:ACTR1B	G	A	0.0852	0.0174499	0.00261585	2.53e-11
2	144225215	rs13024996	Intron:ARHGAP15	C	A	0.364	-0.0109126	0.00151477	5.72e-13
2	147956293	rs72859280	Intergenic	G	T	0.0362	0.0228853	0.00390192	4.44e-09
2	225475560	rs56337305	Intergenic	T	C	0.383	-0.00958838	0.00149928	1.63e-10
3	70968431	rs13094887	Intergenic	A	T	0.301	-0.0103097	0.00158893	8.57e-11
3	85457240	rs62250685	Intron:CADM2	A	G	0.614	-0.0143571	0.00150009	1.05e-21
3	85475292	rs74664784	Intron:CADM2	T	C	0.359	-0.0126562	0.00164769	1.58e-14
3	93994255	rs13066454	Intergenic	C	T	0.398	-0.00877595	0.00149196	4.13e-09
3	131576287	rs9838144	Intron:CPNE4	G	C	0.209	-0.00996422	0.00179252	2.65e-08
3	141124607	rs2011092	Intron:ZBTB38	T	C	0.338643	-0.00890041	0.00154006	7.35e-09
3	141267295	rs60654199	Intron:RASA2	C	A	0.0629	-0.0166603	0.00300198	2.85e-08
3	158187811	rs6787172	Intron:RSRC1	T	G	0.554	-0.00803089	0.00146623	4.27e-08
4	3446091	rs3748034	Nonsynonymous:HGFAC	G	T	0.143	-0.0117403	0.00208193	1.67e-08
4	39406254	rs7682824	Intergenic	C	T	0.548	0.00835609	0.00150322	2.77e-08
4	39414993	rs11940694	Intron:KLB	A	G	0.597	0.0259499	0.00148589	3.03e-68
4	39418965	rs35538052	Intron:KLB	G	A	0.379	-0.00852488	0.00150231	1.39e-08
4	42151306	rs4501255	Intron:BEND4	C	G	0.235	0.0106934	0.00171894	4.83e-10
4	99678691	rs12499107	Intergenic	A	G	0.131202	0.0126612	0.00215872	4.45e-09
4	99713350	rs144198753	Intergenic	C	T	0.016315	-0.0418271	0.00590345	1.35e-12
4	100000136	rs1154414	Intron:ADH5	T	C	0.141063	0.0176304	0.00209382	3.74e-17
4	100239319	rs1229984	Nonsynonymous:ADH1B	T	C	0.963	0.150534	0.0038611	<2.2e-308
4	100254520	rs10028756	Intergenic	G	A	0.129457	-0.0185748	0.00217104	1.16e-17
4	100260679	rs561222871	Intron:ADH1C	C	T	0.047377	-0.0388068	0.00361875	6.56e-27
4	100273594	rs36052336	Intron:ADH1C	A	G	0.061496	-0.0184288	0.00303378	1.23e-09
4	100286085	rs2165670	Intergenic	G	A	0.106337	0.0230804	0.00236427	1.67e-22
4	100443853	rs17029090	Synonymous:C4orf17	A	G	0.019896	-0.0491274	0.00521923	4.75e-21
4	100444363	rs79139602	Intron:C4orf17	A	T	0.021061	0.0602723	0.00507584	1.8e-32
4	101243023	rs4699791	Intergenic	G	A	0.095726	0.0185707	0.0024772	6.58e-14
4	103188709	rs13107325	Nonsynonymous:SLC39A8	C	T	0.0722	-0.0275045	0.00281598	1.53e-22
4	143648579	rs4690727	Intron:INPP4B	C	G	0.718	0.010817	0.00161972	2.43e-11
4	152968372	rs10004020	Intergenic	G	A	0.72	0.00905233	0.00162323	2.43e-08
4	171086393	rs12651313	Intergenic	C	G	0.443	-0.00864293	0.00146722	3.79e-09
5	87854395	rs4916723	Intron:LINC00461	A	C	0.416	-0.00995226	0.00147867	1.72e-11
5	144412335	rs12655091	Intergenic	G	A	0.53	-0.00831211	0.00146029	1.25e-08
5	155902003	rs55872084	Intron:SGCD	G	T	0.235	0.00997874	0.00171894	6.32e-09
5	166803321	rs11739827	Intron:TENM2	G	T	0.451	-0.00837523	0.00146911	1.18e-08
7	69783020	rs10085696	Intron:AUTS2	A	G	0.186	-0.0114089	0.00187308	1.12e-09
7	73042443	rs6460047	Intergenic	T	C	0.208	0.0116235	0.00179569	9.69e-11
7	98977515	rs10236149	Intron:ARPC1B	A	G	0.123	-0.0134981	0.00221908	1.18e-09
7	103840115	rs35034355	Intron:ORC5	G	A	0.521	-0.00809682	0.00145895	2.87e-08
7	153489744	rs6951574	Intergenic	T	C	0.458	0.0132222	0.00146283	1.58e-19
8	20949917	rs13250583	Intergenic	C	T	0.213	-0.00971754	0.00178012	4.7e-08
8	64527399	rs1217091	Intergenic	T	C	0.812	0.0121608	0.00186539	7.05e-11
8	126500031	rs28601761	Intergenic	C	G	0.42	0.00910288	0.00147668	7.17e-10
9	108755622	rs55932213	Intergenic	A	G	0.736387	0.00948827	0.0016542	9.55e-09
9	109345993	rs10978550	Intergenic	T	C	0.206	-0.0117483	0.00180211	7.15e-11
10	110507806	rs7074871	Intergenic	G	A	0.255	-0.00939985	0.00167216	1.86e-08
10	125093880	rs17665139	Intergenic	C	T	0.149	-0.0115601	0.00204676	1.59e-08
11	8642218	rs7950166	Intron:TRIM66	C	T	0.637	-0.0097992	0.00151566	9.89e-11
11	27643725	rs11030084	Intron:BDNF-AS|LINC00678	C	T	0.184	-0.0106068	0.00188093	1.72e-08
11	47397353	rs56030824	Intron:SPI1	G	A	0.322	-0.0116019	0.00156298	1.15e-13
11	113424042	rs10750025	Intergenic	C	T	0.686	0.0103214	0.00157036	4.89e-11
11	113660576	rs1713676	Intergenic	A	G	0.522454	-0.00799198	0.00145913	4.29e-08
11	116075001	rs4938230	Intergenic	C	A	0.842	0.0128104	0.00199821	1.48e-10
11	121544285	rs682011	Intergenic	T	C	0.559	0.00821245	0.00146791	2.22e-08
11	133658168	rs12795042	Intron:LOC646522	A	C	0.623	-0.00831901	0.00150387	3.25e-08
12	51895882	rs10876188	Intron:SLC4A8	C	T	0.457	-0.00798685	0.00146308	4.84e-08
12	54674235	rs3809162	Intergenic	A	G	0.397	0.00906093	0.00148961	1.19e-09
12	81601464	rs10506274	Intron:ACSS3	G	T	0.484	-0.0090374	0.0014584	5.78e-10
12	92170791	rs4842786	Intergenic	G	A	0.584	-0.0087978	0.00147867	2.73e-09
13	27124360	rs500321	Intergenic	A	T	0.736	-0.00966936	0.00165343	4.92e-09
14	57274519	rs1123285	Intron:OTX2	C	G	0.335	-0.00889736	0.00154416	8.14e-09
14	58782779	rs2180870	Intron:ARID4A	T	C	0.135	-0.0121775	0.0021328	1.12e-08
14	94844947	rs28929474	Nonsynonymous:SERPINA1	C	T	0.0183	-0.0367996	0.00543764	1.34e-11
14	104610138	rs11625650	Intron:KIF26A	G	A	0.233	-0.00956809	0.00172405	2.89e-08
15	75027880	rs2472297	Intergenic	C	T	0.249	0.010606	0.00168541	3.1e-10
15	86796012	rs12907323	Intron:AGBL1	A	G	0.411	0.0084966	0.00148131	9.93e-09
16	20013793	rs2764771	Intergenic	G	A	0.307	0.0098906	0.00158174	4.02e-10
16	24810681	rs17177078	Intron:TNRC6A	C	T	0.0626	-0.0223155	0.00301176	1.27e-13
16	28754684	rs378421	Intergenic	G	A	0.404	-0.0112055	0.00148681	4.83e-14
16	29892184	rs113443718	Intron:SEZ6L2	G	A	0.305	-0.0102083	0.00158463	1.19e-10
16	64872590	rs62044525	Intergenic	C	G	0.184	-0.0121732	0.00188285	1.03e-10
16	69131281	rs7185555	Intergenic	G	C	0.153	-0.0111005	0.00202667	4.24e-08
16	72338507	rs79616692	Intron:LINC01572	G	C	0.108	0.0163023	0.00235058	4.11e-12
16	73912588	rs1104608	Intergenic	G	C	0.425	-0.010975	0.00147585	1.05e-13
17	2209888	rs4548913	Intron:SRR	G	A	0.632	-0.00835995	0.00151127	3.11e-08
17	7462969	rs3803800	Nonsynonymous:TNFSF12-TNFSF13|TNFSF13	A	G	0.786	0.0113789	0.00177708	1.5e-10
17	29715500	rs2854334	Intergenic	A	G	0.615	0.00922098	0.00149781	7.51e-10
17	44246624	.	Intron:KANSL1	C	A	0.215	-0.0218001	0.00255853	1.62e-17
17	78524597	rs10438820	Intron:RPTOR	C	T	0.702	0.00897178	0.00159349	1.76e-08
18	53052169	rs9950000	Intron:TCF4	C	T	0.395	-0.0091177	0.0014909	9.38e-10
18	55080437	rs4092465	Intergenic	A	G	0.635	-0.00829188	0.00151388	4.39e-08
19	49214274	rs281379	Intergenic	G	A	0.508	0.0137223	0.00145784	4.91e-21
20	25035711	rs4815364	Intron:ACSS1	G	A	0.616	0.00858236	0.00149854	1.02e-08
22	41946519	rs9607814	Intergenic	C	A	0.2	-0.010181	0.00185879	4.31e-08

## Sheet: SFile 1d ACE2 sample size
Supplementary File 1d. Sample size of ACE2 expression in 44 tissues / organs from GTEx database.
Tissues / Organs	Sample size
Adipose - Subcutaneous	581
Adipose - Visceral (Omentum)	469
Adrenal Gland	233
Artery - Aorta	387
Artery - Coronary	213
Artery - Tibial	584
Brain - Amygdala	129
Brain - Anterior cingulate cortex (BA24)	147
Brain - Caudate (basal ganglia)	194
Brain - Cerebellar Hemisphere	175
Brain - Cerebellum	209
Brain - Cortex	205
Brain - Frontal Cortex (BA9)	175
Brain - Hippocampus	165
Brain - Hypothalamus	170
Brain - Nucleus accumbens (basal ganglia)	202
Brain - Putamen (basal ganglia)	170
Brain - Spinal cord (cervical c-1)	126
Brain - Substantia nigra	114
Breast - Mammary Tissue	396
Colon - Sigmoid	318
Colon - Transverse	368
Esophagus - Gastroesophageal Junction	330
Esophagus - Mucosa	497
Esophagus - Muscularis	465
Heart - Atrial Appendage	372
Heart - Left Ventricle	386
Liver	208
Lung	515
Minor Salivary Gland	144
Muscle - Skeletal	706
Nerve - Tibial	532
Ovary	167
Pancreas	305
Pituitary	237
Prostate	221
Skin - Not Sun Exposed (Suprapubic)	517
Skin - Sun Exposed (Lower leg)	605
Small Intestine - Terminal Ileum	174
Stomach	324
Testis	322
Thyroid	574
Uterus	129
Vagina	141

## Sheet: SFile 1e Statistical power
Supplementary File 1e. Statistical power in Mendelian randomization study on causal association of smoking and alcohol consumption with ACE2 expression and COVID-19.
Outcome	Sample size	R2=0.01	R2=0.015	R2=0.02
		Minimum detectable beta coefficient
ACE2 expression	100	2.66	2.19	1.9
	200	1.95	1.58	1.37
	300	1.6	1.3	1.13
	400	1.38	1.13	0.98
	500	1.24	1.02	0.88
	600	1.14	0.93	0.8
	700	1.05	0.86	0.74
		Minimum detectable odds ratio
Susceptibility to COVID-19	1683768	1.15	1.12	1.11
Hospitalized COVID-19	1887658	1.28	1.23	1.2
Very severe respiratory confirmed COVID-19	1388342	1.39	1.32	1.28
Minimum detectable beta coefficient or odds ratio: assuming 80% power, 5% alpha level, and that 1% to 2% of smoking and alcohol lifestyle variance is explained by SNPs included in the current analyses.

## Sheet: SFile 1f Smk Main
Supplementary File 1f. Causal association of smoking initiation and ACE2 expression.
Organ/Tissue		Inverse-variance weighted					MR-Egger					Weighted median				MR-PRESSO
	N of IVs	Beta	SE	p	p-het		Beta	SE	p	p-inter		Beta	SE	p		Beta	SE	p	global p
Adipose - Visceral (Omentum)	358	-0.201912	0.12805	0.114836	0.434254		-0.500518	0.537079	0.352006	0.567329		-0.42555	0.188824	0.0242162		-0.20191	0.12805	0.115722	0.436
Adrenal Gland	358	0.365929	0.286801	0.201992	0.540179		1.12799	1.24284	0.36471	0.52888		0.77594	0.415872	0.0620673		0.365929	0.286801	0.202821	0.56
Artery - Aorta	360	-0.0654641	0.189502	0.729753	0.0679773		1.02427	0.808407	0.205973	0.166448		-0.165905	0.277757	0.550305		-0.06546	0.189502	0.729955	0.064
Artery - Coronary	361	-0.0964473	0.181392	0.59493	0.184388		0.368092	0.791791	0.642295	0.547053		-0.210571	0.271786	0.438477		-0.09645	0.181392	0.595258	0.208
Artery - Tibial	361	0.238294	0.190142	0.210117	0.421804		1.08487	0.811616	0.182173	0.284026		0.296858	0.28	0.289051		0.238294	0.190142	0.21093	0.448
Brain - Amygdala	360	0.311391	0.459525	0.498001	0.293194		-1.42614	1.93463	0.461504	0.355799		0.321505	0.678761	0.635739		0.311391	0.459525	0.498438	0.3
Brain - Anterior cingulate cortex (BA24)	357	0.455267	0.466387	0.328986	0.0750732		-1.39929	1.93119	0.46919	0.323037		0.224828	0.65686	0.732142		0.455267	0.466387	0.329649	0.076
Brain - Caudate (basal ganglia)	360	1.06266	0.322126	0.000970714	0.538324		-1.57337	1.36622	0.250244	0.0478025		0.657265	0.500277	0.188913		1.06266	0.322126	0.001068	0.571
Brain - Cerebellar Hemisphere	360	1.19355	0.390271	0.00222617	0.243085		-1.42419	1.61378	0.378088	0.0954991		0.693832	0.57769	0.229734		1.19355	0.390271	0.002393	0.242
Brain - Cerebellum	357	0.0205513	0.354878	0.95382	0.615002		-2.94787	1.53364	0.0553877	0.0472577		-0.329394	0.537903	0.540294		0.020551	0.354878	0.953852	0.605
Brain - Cortex	359	0.492982	0.383227	0.198305	0.685584		2.56501	1.63752	0.11814	0.193426		0.749301	0.575601	0.192994		0.492982	0.383227	0.199136	0.705
Brain - Frontal Cortex (BA9)	357	0.849916	0.477135	0.0748649	0.00357311		0.721374	1.96087	0.713178	0.94615		0.748408	0.66449	0.260043		0.849916	0.477135	0.075717	0.007
Brain - Hippocampus	357	0.516154	0.437168	0.237731	0.109835		2.37852	1.83456	0.195643	0.296614		0.816027	0.633709	0.19785		0.516154	0.437168	0.23852	0.103
Brain - Nucleus accumbens (basal ganglia)	361	0.650968	0.375951	0.0833585	0.699946		-0.42148	1.61739	0.794556	0.49532		0.721276	0.598999	0.228537		0.650968	0.375951	0.084215	0.706
Brain - Spinal cord (cervical c-1)	359	0.173977	0.549684	0.75162	0.0218122		0.99001	2.28566	0.665175	0.713207		1.2087	0.763391	0.113345		0.173977	0.549684	0.751804	0.024
Brain - Substantia nigra	358	0.878199	0.452866	0.0524768	0.29941		-2.19393	1.82295	0.22958	0.0828163		0.362603	0.666059	0.586166		0.878199	0.452866	0.053264	0.292
Breast - Mammary Tissue	360	0.0132658	0.166252	0.936402	0.0341961		0.849256	0.7171	0.237083	0.231552		-0.115049	0.223682	0.607011		0.013266	0.166252	0.936446	0.026
Esophagus - Gastroesophageal Junction	358	-0.0234767	0.228335	0.918108	0.669004		-0.896082	1.03079	0.385262	0.385488		0.0652703	0.354866	0.854069		-0.02348	0.228335	0.918166	0.697
Esophagus - Mucosa	359	-0.00690207	0.112238	0.950965	0.688941		-0.0141793	0.494344	0.977133	0.987935		-0.103372	0.173213	0.550647		-0.0069	0.112238	0.950999	0.71
Esophagus - Muscularis	357	0.0601895	0.202154	0.765901	0.105299		-0.0925178	0.858281	0.91422	0.854834		-0.103554	0.292521	0.723335		0.06019	0.202154	0.766074	0.1
Heart - Atrial Appendage	359	-0.0333753	0.191929	0.861949	0.853076		-0.381983	0.852333	0.654309	0.674198		-0.00185783	0.29476	0.994971		-0.03338	0.191929	0.862047	0.871
Heart - Left Ventricle	362	-0.150554	0.144277	0.296714	0.453748		-0.727346	0.616243	0.238664	0.336322		-0.356942	0.209262	0.0880615		-0.15055	0.144277	0.297412	0.477
Liver	359	-0.0381163	0.238484	0.873017	0.624419		-0.576382	1.02422	0.573957	0.588987		-0.270134	0.354074	0.445504		-0.03812	0.238484	0.873107	0.645
Lung	360	0.183281	0.158857	0.248604	0.392552		0.0115288	0.685565	0.986592	0.796899		0.205761	0.228379	0.367609		0.183281	0.158857	0.249372	0.409
Minor Salivary Gland	357	0.0381141	0.341278	0.911077	0.264832		0.56657	1.51042	0.707804	0.719669		-0.131754	0.529325	0.803431		0.038114	0.341278	0.91114	0.247
Muscle - Skeletal	361	0.141611	0.134968	0.294076	0.421288		0.411579	0.580675	0.478913	0.632912		-0.005825	0.211822	0.978061		0.141611	0.134968	0.29478	0.447
Nerve - Tibial	360	-0.192929	0.167823	0.250308	0.503057		-0.287408	0.703045	0.682928	0.890005		-0.368815	0.257449	0.15198		-0.19293	0.167823	0.251074	0.532
Ovary	362	-0.156746	0.331749	0.636581	0.0777735		2.05108	1.43814	0.154676	0.115543		-0.626094	0.482448	0.194376		-0.15675	0.331749	0.636867	0.074
Pancreas	361	0.0643382	0.206828	0.755747	0.155651		0.945761	0.881307	0.283931	0.304237		0.0747017	0.306706	0.807571		0.064338	0.206828	0.755927	0.17
Pituitary	357	0.592464	0.362198	0.101893	0.259654		1.9378	1.55925	0.214769	0.375629		0.769568	0.536236	0.15125		0.592464	0.362198	0.102776	0.243
Prostate	357	-0.0177816	0.325033	0.956372	0.252672		-1.1162	1.38806	0.421851	0.416197		0.107903	0.481748	0.822772		-0.01778	0.325033	0.956403	0.232
Skin - Not Sun Exposed (Suprapubic)	360	-0.103439	0.177426	0.559893	0.914432		0.163592	0.815036	0.841034	0.736602		-0.227087	0.265512	0.392397		-0.10344	0.177426	0.560259	0.917
Skin - Sun Exposed (Lower leg)	359	-0.0672181	0.163878	0.681681	0.343526		0.611305	0.693338	0.378541	0.314536		-0.0260864	0.234733	0.911511		-0.06722	0.163878	0.681926	0.357
Small Intestine - Terminal Ileum	359	-0.176946	0.158772	0.265079	0.125787		-0.00915227	0.685228	0.989351	0.801385		-0.0666013	0.234245	0.776162		-0.17695	0.158772	0.265827	0.112
Stomach	359	-0.00850732	0.246646	0.972485	0.00645197		1.45533	1.06703	0.173455	0.159422		0.114769	0.34643	0.740425		-0.00851	0.246646	0.972504	0.004
Testis	359	-0.102244	0.0975217	0.294443	0.637966		-0.0352617	0.431499	0.934916	0.873382		-0.0906674	0.145788	0.534		-0.10224	0.097522	0.295151	0.661
Thyroid	358	0.131943	0.160219	0.410212	0.72145		0.81382	0.69101	0.239693	0.310419		0.118293	0.240712	0.623123		0.131943	0.160219	0.410762	0.739
Uterus	360	-0.233482	0.455808	0.608484	0.669357		0.190029	1.95417	0.922588	0.823588		-0.61919	0.704446	0.379415		-0.23348	0.455808	0.608799	0.687
Vagina	359	0.112458	0.250978	0.654096	0.0516915		0.749822	1.08554	0.490181	0.546546		0.499886	0.346468	0.149075		0.112458	0.250978	0.654367	0.048

## Sheet: SFile 1g Cig Main
Supplementary File 1g. Causal association of cigarettes per day and ACE2 expression.
Organ/Tissue		Inverse-variance weighted					MR-Egger					Weighted median				MR-PRESSO
	N of IVs	Beta	SE	p	p-het		Beta	SE	p	p-inter		Beta	SE	p		Beta	SE	p	global p
Adipose - Subcutaneous	46	-0.124634	0.287158	0.664269	0.615729		-0.114427	0.647241	0.860484	0.985899		0.206505	0.470348	0.660626		-0.124634	0.287158	0.666343	0.582
Adipose - Visceral (Omentum)	47	-0.473114	0.280176	0.0912898	0.848182		-1.25234	0.713278	0.0859361	0.229486		-0.49432	0.46954	0.292444		-0.473114	0.280176	0.0980587	0.871
Adrenal Gland	47	0.157298	0.729841	0.829359	0.375079		2.26624	1.66363	0.179908	0.166246		0.854208	1.1066	0.440159		0.157298	0.729841	0.830312	0.403
Artery - Aorta	46	-0.819157	0.51631	0.112612	0.113686		0.226313	1.24074	0.856105	0.358999		-0.726304	0.748155	0.331652		-0.819157	0.51631	0.119615	0.116
Artery - Coronary	47	0.489432	0.491033	0.318891	0.116493		1.02123	1.10615	0.36081	0.593527		0.344083	0.674901	0.610172		0.489432	0.491033	0.324105	0.136
Artery - Tibial	45	-0.36116	0.472559	0.44471	0.44846		-0.647781	1.08547	0.553788	0.770145		0.318422	0.758591	0.674665		-0.36116	0.472559	0.448789	0.455
Brain - Amygdala	48	0.754794	1.01391	0.456612	0.733637		0.843564	2.38161	0.724809	0.966735		0.772291	1.56044	0.620658		0.754794	1.01391	0.460318	0.76
Brain - Anterior cingulate cortex (BA24)	48	-0.557726	1.20227	0.642723	0.108126		-4.45023	2.54962	0.0875846	0.0918945		-1.94437	1.70619	0.254453		-0.557726	1.20227	0.644864	0.117
Brain - Caudate (basal ganglia)	48	-0.18612	0.846023	0.825876	0.251168		-1.32919	1.88115	0.483388	0.499079		0.773694	1.27429	0.543747		-0.18612	0.846023	0.826828	0.264
Brain - Cerebellar Hemisphere	48	0.761994	0.968418	0.431373	0.313422		-0.804423	2.1218	0.706341	0.410582		2.29444	1.47733	0.120399		0.761994	0.968418	0.435323	0.328
Brain - Cerebellum	47	-0.569543	0.947028	0.547573	0.267085		-1.19355	2.167	0.584505	0.749768		-1.18705	1.38671	0.391988		-0.569543	0.947028	0.550526	0.297
Brain - Cortex	48	0.760903	0.858053	0.375198	0.716101		1.09491	1.98585	0.584059	0.850396		0.402939	1.46225	0.782885		0.760903	0.858053	0.379713	0.744
Brain - Frontal Cortex (BA9)	48	0.918901	1.01849	0.36694	0.618234		0.952237	2.35458	0.687778	0.987422		1.06551	1.82067	0.558394		0.918901	1.01849	0.37154	0.635
Brain - Hippocampus	48	1.07834	0.995076	0.278506	0.346211		0.249171	2.10259	0.906182	0.655693		0.40629	1.50456	0.78713		1.07834	0.995076	0.284034	0.404
Brain - Nucleus accumbens (basal ganglia)	48	0.986642	0.871761	0.257727	0.788999		0.074614	2.12793	0.97218	0.633638		2.10691	1.39097	0.129845		0.986642	0.871761	0.263468	0.796
Brain - Putamen (basal ganglia)	48	1.07519	0.979569	0.272373	0.273379		2.67151	2.04741	0.198442	0.378899		2.31458	1.52585	0.129288		1.07519	0.979569	0.277965	0.235
Brain - Spinal cord (cervical c-1)	49	0.311392	1.01314	0.758574	0.583213		3.33129	1.83206	0.0753887	0.050778		1.38641	1.66129	0.403979		0.311392	1.01314	0.759903	0.618
Brain - Substantia nigra	48	1.13777	1.3269	0.39119	0.0499513		-1.84453	3.03754	0.546674	0.280981		-0.360929	1.74754	0.836373		1.13777	1.3269	0.395541	0.052
Breast - Mammary Tissue	48	-0.046141	0.295382	0.875869	0.973789		-1.45743	0.810129	0.0785796	0.0564375		-0.573301	0.548145	0.29561		-0.046141	0.295382	0.876538	0.975
Colon - Transverse	46	-0.237958	0.231286	0.303552	0.954429		-0.158864	0.636006	0.803917	0.890294		-0.0643633	0.429245	0.880808		-0.237958	0.231286	0.30905	0.969
Esophagus - Gastroesophageal Junction	48	0.366198	0.584778	0.531173	0.416487		1.86322	1.36102	0.177652	0.229925		0.880567	0.856809	0.304078		0.366198	0.584778	0.534202	0.443
Esophagus - Mucosa	47	-0.302437	0.307348	0.325105	0.244462		-0.023371	0.718986	0.974213	0.669095		-0.300558	0.486862	0.537012		-0.302437	0.307348	0.330252	0.269
Esophagus - Muscularis	47	-0.146487	0.562352	0.794486	0.064723		0.552474	1.32175	0.677944	0.561282		-0.0527871	0.781145	0.946123		-0.146487	0.562352	0.795649	0.077
Heart - Atrial Appendage	47	-0.642674	0.514833	0.211915	0.297654		-0.333794	1.16267	0.77536	0.767811		-1.00689	0.768317	0.190022		-0.642674	0.514833	0.218232	0.339
Heart - Left Ventricle	48	0.202319	0.366377	0.580801	0.396276		-0.0357302	0.854798	0.966839	0.758779		0.236244	0.539489	0.661457		0.202319	0.366377	0.583417	0.42
Lung	45	-0.542715	0.351928	0.123045	0.818206		0.0502236	0.882693	0.95489	0.457447		-0.683768	0.603894	0.257523		-0.542715	0.351928	0.130207	0.856
Minor Salivary Gland	47	0.81646	0.966599	0.398293	0.299611		0.515473	2.89982	0.859709	0.912707		0.947883	1.30689	0.468269		0.81646	0.966599	0.402665	0.319
Muscle - Skeletal	45	0.177829	0.311465	0.568037	0.720785		0.0244808	0.750739	0.974137	0.820585		-0.0195653	0.532036	0.970665		0.177829	0.311465	0.570941	0.765
Nerve - Tibial	47	-0.471073	0.403963	0.243563	0.468813		-0.00559453	0.899478	0.995065	0.564628		-0.656381	0.625307	0.293859		-0.471073	0.403963	0.249573	0.489
Pancreas	47	0.122468	0.592956	0.836371	0.0287026		1.91639	1.31517	0.152019	0.134817		1.23837	0.809639	0.126132		0.122468	0.592956	0.837282	0.031
Pituitary	48	-0.901912	0.682309	0.186217	0.967023		-1.06006	1.82228	0.563594	0.922459		-0.820754	1.21053	0.497763		-0.901912	0.682309	0.192615	0.972
Prostate	47	-1.22188	0.84786	0.149545	0.135902		-1.32568	1.93261	0.496261	0.952479		-0.615397	1.19668	0.607074		-1.22188	0.84786	0.156318	0.155
Skin - Not Sun Exposed (Suprapubic)	46	-0.250209	0.403384	0.535077	0.912226		-1.34044	1.06724	0.215748	0.26073		-0.0129874	0.711292	0.985432		-0.250209	0.403384	0.538206	0.939
Skin - Sun Exposed (Lower leg)	46	0.235759	0.409519	0.564819	0.475221		0.0821571	0.951987	0.931619	0.85862		0.748472	0.636581	0.239687		0.235759	0.409519	0.567687	0.497
Small Intestine - Terminal Ileum	47	-0.336241	0.45539	0.460297	0.137682		0.601001	1.20776	0.621179	0.40629		-0.438811	0.643995	0.495626		-0.336241	0.45539	0.464048	0.157
Stomach	47	0.0481122	0.54628	0.929819	0.580406		-0.732777	1.28849	0.57238	0.504044		0.278481	0.873164	0.749777		0.0481122	0.54628	0.930201	0.611
Testis	47	0.0970441	0.261826	0.710903	0.210557		0.0753407	0.59356	0.899561	0.967594		0.0795381	0.386938	0.837136		0.0970441	0.261826	0.712604	0.228
Uterus	47	-1.63716	1.11762	0.142957	0.0828744		-3.18896	1.94903	0.108778	0.336184		-2.45322	1.50993	0.104222		-1.63716	1.11762	0.149759	0.107

## Sheet: SFile 1h Drk Main
Supplementary File 1h. Causal association of drinks per week and ACE2 expression.
Organ/Tissue		Inverse-variance weighted					MR-Egger					Weighted median				MR-PRESSO
	N of IVs	Beta	SE	p	p-het		Beta	SE	p	p-inter		Beta	SE	p		Beta	SE	p	global p
Adipose - Subcutaneous	87	-0.762023	0.393976	0.0530902	0.101286		-0.76979	0.69262	0.269522	0.989123		-1.07709	0.640562	0.0926705		-0.762023	0.393976	0.0563785	0.13
Adipose - Visceral (Omentum)	87	0.339677	0.446631	0.446938	0.0536159		0.838167	0.808005	0.302525	0.460628		0.952708	0.729983	0.191856		0.339677	0.446631	0.449018	0.067
Adrenal Gland	85	0.0466413	0.997352	0.9627	0.0937699		1.8227	1.80472	0.315449	0.241526		1.97702	1.54336	0.2002		0.0466413	0.997352	0.962811	0.108
Artery - Aorta	86	0.916317	0.524221	0.080471	0.738578		0.0170135	0.966351	0.985995	0.25958		-0.248745	0.950666	0.793588		0.916317	0.524221	0.084082	0.734
Artery - Coronary	85	-0.106241	0.486742	0.827219	0.681603		-0.241896	0.869799	0.781623	0.848242		-0.291941	0.911236	0.748681		-0.106241	0.486742	0.827748	0.711
Artery - Tibial	86	0.0705976	0.614291	0.908504	0.140284		1.35269	1.06268	0.206564	0.144352		1.07494	0.936233	0.250906		0.0705976	0.614291	0.908775	0.128
Brain - Amygdala	87	-1.1647	1.33618	0.383388	0.665752		-4.06369	2.4482	0.100626	0.154455		-3.41717	2.44963	0.163023		-1.1647	1.33618	0.385815	0.696
Brain - Anterior cingulate cortex (BA24)	86	1.26028	1.6718	0.450944	0.182466		-5.96402	4.46055	0.184813	0.0848872		-1.68929	2.37729	0.477334		1.26028	1.6718	0.453027	0.188
Brain - Caudate (basal ganglia)	86	0.118123	1.0054	0.906473	0.422522		-0.781841	1.77985	0.661591	0.540986		0.209505	1.77767	0.906183		0.118123	1.0054	0.90675	0.434
Brain - Cerebellar Hemisphere	88	-0.741157	1.11141	0.50486	0.590986		-0.455339	2.01062	0.821376	0.863643		-0.615389	2.18166	0.777887		-0.741157	1.11141	0.506625	0.615
Brain - Cerebellum	86	-0.622073	1.13046	0.582125	0.263311		-1.13706	2.04323	0.579346	0.76241		-2.81258	1.94525	0.148214		-0.622073	1.13046	0.583568	0.259
Brain - Cortex	85	0.969763	1.24413	0.435701	0.345882		-0.658466	2.15854	0.76109	0.358437		-0.37154	2.00781	0.853192		0.969763	1.24413	0.437892	0.372
Brain - Frontal Cortex (BA9)	87	-0.214848	1.28964	0.867688	0.325251		3.05402	2.03698	0.137504	0.0435704		1.28036	1.94256	0.509826		-0.214848	1.28964	0.868079	0.343
Brain - Hippocampus	87	-0.146553	1.22572	0.904828	0.649931		-0.952214	2.22699	0.670039	0.661045		-2.15246	2.20866	0.329782		-0.146553	1.22572	0.905107	0.682
Brain - Hypothalamus	86	1.46489	1.05322	0.164265	0.47879		2.96419	1.71542	0.087668	0.271374		2.82988	1.74782	0.105429		1.46489	1.05322	0.167895	0.479
Brain - Nucleus accumbens (basal ganglia)	87	-0.166645	1.11887	0.881601	0.519589		-2.05643	1.9559	0.296054	0.240337		-2.92146	1.87684	0.119569		-0.166645	1.11887	0.88195	0.514
Brain - Putamen (basal ganglia)	87	0.462771	1.282	0.718118	0.334093		-1.11901	2.34168	0.633973	0.4214		-0.658732	2.2484	0.769539		0.462771	1.282	0.719003	0.357
Brain - Spinal cord (cervical c-1)	88	1.68153	1.58896	0.289937	0.397446		4.40842	2.80088	0.119173	0.240869		4.59458	2.89795	0.112861		1.68153	1.58896	0.292866	0.385
Brain - Substantia nigra	86	-0.685314	1.5562	0.659665	0.397672		0.0543946	4.01592	0.989225	0.841958		-0.375591	2.24148	0.866926		-0.685314	1.5562	0.660783	0.397
Breast - Mammary Tissue	87	-0.395697	0.522205	0.448605	0.0244093		-0.750918	0.850697	0.379883	0.597282		-1.42155	0.747445	0.0571876		-0.395697	0.522205	0.450677	0.026
Colon - Sigmoid	87	-0.356931	0.753261	0.635609	0.047489		0.186901	1.31728	0.887507	0.615345		-0.451065	1.19453	0.70572		-0.356931	0.753261	0.63681	0.066
Colon - Transverse	87	-0.340104	0.354299	0.337088	0.186033		-0.0464304	0.621987	0.94067	0.566441		-0.934135	0.574877	0.104177		-0.340104	0.354299	0.339779	0.199
Esophagus - Gastroesophageal Junction	86	1.24936	0.719546	0.0825071	0.336056		2.0051	1.23609	0.108522	0.453606		1.47523	1.19036	0.21523		1.24936	0.719546	0.0861303	0.354
Esophagus - Mucosa	86	-0.0145479	0.364518	0.968165	0.196131		0.157091	0.628154	0.803133	0.737396		-0.204667	0.603788	0.734631		-0.0145479	0.364518	0.968259	0.21
Esophagus - Muscularis	86	-0.825007	0.581666	0.156088	0.456079		-0.960306	1.04647	0.361421	0.876457		-1.14293	1.06422	0.282843		-0.825007	0.581666	0.159744	0.467
Heart - Atrial Appendage	86	0.351367	0.579014	0.543959	0.467314		0.9314	0.954795	0.332115	0.446355		-0.368511	0.947105	0.697208		0.351367	0.579014	0.545577	0.447
Heart - Left Ventricle	84	0.131354	0.500677	0.793049	0.691994		2.10972	1.44935	0.149311	0.147122		0.201074	0.772906	0.794745		0.131354	0.500677	0.793699	0.716
Liver	87	0.0753322	0.672504	0.910809	0.719938		-0.331073	1.18152	0.779998	0.668939		-0.634267	1.21839	0.602662		0.0753322	0.672504	0.911071	0.747
Lung	86	0.274593	0.594456	0.644136	0.145228		1.19927	1.52072	0.432555	0.510413		1.02162	0.935117	0.274611		0.274593	0.594456	0.645316	0.149
Minor Salivary Gland	84	1.0039	1.26149	0.426148	0.0732384		2.59911	2.85604	0.365469	0.534934		2.78745	1.77981	0.117314		1.0039	1.26149	0.428418	0.086
Muscle - Skeletal	87	0.428753	0.376027	0.254194	0.668879		0.993689	0.664112	0.138288	0.295949		0.791878	0.65562	0.227113		0.428753	0.376027	0.25736	0.711
Nerve - Tibial	86	-1.46179	0.532118	0.0060122	0.319342		0.335674	0.935175	0.720539	0.0233059		-0.640755	0.943172	0.496909		-1.46179	0.532118	0.00733877	0.338
Ovary	86	0.528314	1.015	0.602712	0.157027		-0.686632	1.70981	0.68901	0.379427		-2.8764	1.55152	0.063749		0.528314	1.015	0.604065	0.1
Pancreas	86	-0.294003	0.57164	0.607032	0.668629		0.213743	1.05071	0.839293	0.559645		0.302322	1.05177	0.773774		-0.294003	0.57164	0.608367	0.683
Pituitary	86	0.328831	1.15019	0.774959	0.162989		-2.63531	1.97884	0.186545	0.0710479		-4.23953	1.75473	0.0156894		0.328831	1.15019	0.775655	0.117
Prostate	87	0.866882	0.977276	0.375058	0.311463		-1.02042	1.64474	0.536643	0.158662		0.35889	1.56341	0.818436		0.866882	0.977276	0.377531	0.343
Skin - Not Sun Exposed (Suprapubic)	88	-0.853778	0.530052	0.107236	0.62704		0.167381	0.913044	0.854977	0.166709		-0.746208	0.960147	0.437052		-0.853778	0.530052	0.110858	0.654
Skin - Sun Exposed (Lower leg)	87	-0.128125	0.615153	0.835009	0.121646		1.62009	1.6987	0.342926	0.272761		0.0779104	0.865737	0.928293		-0.128125	0.615153	0.835501	0.14
Small Intestine - Terminal Ileum	87	-0.334169	0.467457	0.474693	0.509715		0.0204793	0.878516	0.981457	0.63396		-0.128682	0.925305	0.889395		-0.334169	0.467457	0.476629	0.52
Stomach	86	-1.09179	0.764022	0.153002	0.0794821		-1.03119	1.4267	0.471822	0.95991		-0.341164	1.31196	0.794832		-1.09179	0.764022	0.156666	0.091
Testis	86	-0.283817	0.33104	0.391252	0.658006		-0.775365	0.913727	0.39853	0.56319		-0.938197	0.52755	0.0753377		-0.283817	0.33104	0.393662	0.672
Thyroid	85	-0.653152	0.424746	0.124111	0.95399		-1.56349	0.846774	0.0683972	0.191639		-0.824383	0.864022	0.340022		-0.653152	0.424746	0.12787	0.956
Uterus	85	-1.2881	1.75869	0.463914	0.00976638		-3.14965	3.4025	0.357294	0.523979		0.206341	2.55112	0.935535		-1.2881	1.75869	0.465953	0.016
Vagina	85	-0.435724	0.780683	0.576754	0.668507		-0.638367	2.2014	0.772553	0.921365		-0.39563	1.19256	0.740079		-0.435724	0.780683	0.578239	0.681

## Sheet: SFile 1i Smk Ex_palindromy
Supplementary File 1i. Causal association of smoking initiation and ACE2 expression excluding palindromic SNPs.
Organ/Tissue	N of IVs	Inverse-variance weighted					MR-Egger					Weighted median
		Beta	SE	p	p-het		Beta	SE	p	p-inter		Beta	SE	p
Adipose - Subcutaneous	313	0.279649	0.125763	0.026174	0.84928		0.562383	0.547604	0.305224	0.595228		0.11117	0.203662	0.585166
Adipose - Visceral (Omentum)	312	-0.24712	0.131013	0.0592636	0.836089		-0.592406	0.56008	0.291009	0.525472		-0.465244	0.208403	0.0255867
Adrenal Gland	313	0.297457	0.293826	0.311367	0.868061		1.84051	1.30938	0.16083	0.226264		0.629318	0.458219	0.169629
Artery - Aorta	315	-0.0804965	0.203501	0.692431	0.0625453		0.89115	0.85351	0.297245	0.242017		-0.176084	0.28864	0.54183
Artery - Coronary	315	-0.129098	0.196743	0.511711	0.115526		0.308353	0.845154	0.715471	0.594927		-0.225773	0.292408	0.440045
Artery - Tibial	315	0.272983	0.201206	0.174865	0.539994		1.14964	0.845786	0.175045	0.286587		0.299946	0.300036	0.317455
Brain - Amygdala	314	0.33317	0.502675	0.507462	0.159458		-0.957675	2.07192	0.644248	0.521186		0.173465	0.720734	0.809805
Brain - Anterior cingulate cortex (BA24)	311	0.485819	0.507232	0.338171	0.0412499		-1.24169	2.05383	0.545906	0.386053		0.271586	0.757012	0.719774
Brain - Caudate (basal ganglia)	314	1.00528	0.335852	0.00276042	0.775267		-1.54223	1.4292	0.281381	0.0671104		0.539348	0.532009	0.31068
Brain - Cerebellar Hemisphere	314	1.10369	0.422145	0.00893653	0.188652		-1.14965	1.70993	0.501868	0.174886		0.682802	0.610075	0.26305
Brain - Cerebellum	313	0.0294925	0.372271	0.936855	0.766126		-3.77127	1.61272	0.0199973	0.0158159		-0.395857	0.581682	0.496164
Brain - Cortex	314	0.452654	0.408163	0.267429	0.69351		2.60699	1.71068	0.128534	0.195069		0.829729	0.637297	0.192933
Brain - Frontal Cortex (BA9)	313	1.0442	0.506441	0.0392236	0.00859235		0.927901	2.03833	0.649265	0.953064		0.866322	0.702911	0.217771
Brain - Hippocampus	312	0.606626	0.470898	0.197665	0.0865198		2.46619	1.93719	0.203943	0.323132		1.10887	0.702345	0.114379
Brain - Hypothalamus	311	0.995231	0.397237	0.0122319	0.542875		1.53738	1.66171	0.355594	0.737015		0.57848	0.583356	0.321373
Brain - Nucleus accumbens (basal ganglia)	314	0.703286	0.399141	0.0780697	0.757071		0.66331	1.69188	0.695285	0.980583		0.743333	0.599224	0.214793
Brain - Putamen (basal ganglia)	312	1.29683	0.430455	0.00258936	0.407648		2.44301	1.79258	0.173921	0.510572		1.57015	0.632862	0.0131003
Brain - Spinal cord (cervical c-1)	314	0.0783349	0.57779	0.892156	0.0820502		2.45323	2.34042	0.295357	0.295849		1.19248	0.84679	0.15906
Brain - Substantia nigra	313	0.828309	0.489118	0.0903653	0.217371		-2.29603	1.92066	0.232826	0.0936067		0.400454	0.725911	0.581184
Breast - Mammary Tissue	315	-0.0386313	0.177078	0.827305	0.0491358		1.12403	0.75029	0.135109	0.111848		-0.177337	0.253503	0.484211
Colon - Sigmoid	314	0.188221	0.227386	0.407807	0.90555		1.57662	0.991223	0.112715	0.149825		0.305027	0.342547	0.373216
Colon - Transverse	315	0.197525	0.121797	0.104856	0.280403		0.842819	0.498333	0.0917798	0.182749		0.265813	0.178103	0.135577
Esophagus - Gastroesophageal Junction	313	-0.0438329	0.24268	0.856666	0.710736		-1.48969	1.09028	0.17282	0.174193		-0.0349117	0.380058	0.92681
Esophagus - Mucosa	313	0.0264408	0.121311	0.827461	0.58922		0.0886402	0.520543	0.864897	0.90223		-0.0570629	0.18738	0.760723
Esophagus - Muscularis	312	-0.00882102	0.217366	0.96763	0.0946849		-0.791619	0.905904	0.38288	0.374087		-0.140633	0.314253	0.654504
Heart - Atrial Appendage	313	-0.050023	0.203491	0.805819	0.887435		-0.318368	0.895281	0.722376	0.757769		-0.0605996	0.306527	0.843282
Heart - Left Ventricle	315	-0.1832	0.153461	0.232558	0.526053		-0.740206	0.643725	0.251071	0.373521		-0.408884	0.233697	0.0801825
Liver	314	-0.0325278	0.249629	0.896326	0.762613		-0.347554	1.0717	0.745928	0.762244		-0.207695	0.39151	0.595766
Lung	313	0.328698	0.169868	0.0529875	0.420157		0.19277	0.718008	0.788509	0.845629		0.325139	0.248187	0.190178
Minor Salivary Gland	311	-0.168267	0.36556	0.645302	0.279495		-0.571052	1.59252	0.720151	0.795126		-0.324296	0.565701	0.566465
Muscle - Skeletal	315	0.047746	0.143523	0.739383	0.479212		0.277111	0.606298	0.647949	0.697244		-0.135353	0.220991	0.540218
Nerve - Tibial	315	-0.211815	0.1805	0.240599	0.430411		-0.620398	0.740757	0.40294	0.56993		-0.513726	0.269541	0.0566589
Ovary	315	-0.204359	0.357425	0.567489	0.0713451		2.17527	1.52538	0.15485	0.10962		-0.650066	0.488774	0.183521
Pancreas	315	0.106483	0.218995	0.626802	0.245623		0.592406	0.918188	0.519276	0.586153		0.09114	0.325885	0.779732
Pituitary	312	0.564477	0.389896	0.147683	0.20621		1.61973	1.64806	0.326468	0.510358		0.706015	0.542718	0.193297
Prostate	312	-0.269743	0.333715	0.418917	0.633516		-0.784685	1.42315	0.581775	0.709747		-0.176963	0.498922	0.722821
Skin - Not Sun Exposed (Suprapubic)	314	-0.143102	0.192971	0.458347	0.807725		0.130177	0.858299	0.879547	0.743571		-0.274125	0.297689	0.357131
Skin - Sun Exposed (Lower leg)	314	-0.153817	0.173413	0.37508	0.445652		0.222915	0.72074	0.75731	0.590575		-0.0576291	0.261869	0.825818
Small Intestine - Terminal Ileum	315	-0.218085	0.165205	0.186806	0.312562		-0.199948	0.706172	0.777254	0.97894		-0.0639829	0.248188	0.796561
Stomach	314	-0.0943827	0.267436	0.724151	0.00340966		1.30824	1.14118	0.252512	0.207089		0.104607	0.381062	0.783689
Testis	313	-0.113213	0.100866	0.261688	0.873477		0.00576069	0.45315	0.989865	0.787333		-0.0635659	0.1508	0.673372
Thyroid	314	0.062118	0.170171	0.715088	0.74507		0.76298	0.724387	0.293029	0.319518		0.0395344	0.257114	0.877797
Uterus	314	-0.405791	0.486993	0.404699	0.668872		1.01723	2.05292	0.620594	0.475548		-1.07446	0.742941	0.148116
Vagina	312	0.232825	0.269965	0.388454	0.0552187		0.164588	1.14866	0.886157	0.9513		0.64865	0.378307	0.0864162

## Sheet: SFile 1j Cig Ex_palindromy
Supplementary File 1j. Causal association of cigarettes per day and ACE2 expression excluding palindromic SNPs.
Organ/Tissue	N of IVs	Inverse-variance weighted					MR-Egger					Weighted median
		Beta	SE	p	p-het		Beta	SE	p	p-inter		Beta	SE	p
Adipose - Subcutaneous	42	-0.15545	0.303933	0.609028	0.565432		-0.433159	0.694101	0.536133	0.656609		0.236298	0.499106	0.635898
Adipose - Visceral (Omentum)	42	-0.407554	0.292134	0.162987	0.865171		-1.45971	0.771456	0.0657258	0.137946		-0.540647	0.498213	0.277846
Adrenal Gland	42	0.255556	0.727375	0.725333	0.574359		2.1174	1.75724	0.235299	0.24844		0.922105	1.15826	0.425966
Artery - Aorta	42	-0.962204	0.541519	0.0755913	0.0961552		-0.0650789	1.27863	0.959661	0.442691		-0.862639	0.792519	0.276384
Artery - Coronary	41	0.487006	0.533718	0.361518	0.121312		0.828775	1.2507	0.511453	0.763545		0.315089	0.76225	0.679338
Artery - Tibial	41	-0.34645	0.451918	0.443307	0.726013		-1.20768	1.12833	0.291051	0.402327		0.310557	0.801953	0.69857
Brain - Amygdala	42	0.273906	1.11625	0.806162	0.635412		1.19949	2.62633	0.650345	0.695924		0.64006	1.71031	0.708229
Brain - Anterior cingulate cortex (BA24)	43	-0.843742	1.27558	0.508319	0.117731		-5.65089	2.7662	0.047533	0.0589912		-2.05013	1.83824	0.264737
Brain - Caudate (basal ganglia)	43	-0.538295	0.894391	0.54727	0.260759		-1.97358	2.05039	0.341422	0.44058		0.208087	1.31197	0.873978
Brain - Cerebellar Hemisphere	43	0.544417	1.05468	0.605721	0.25248		-1.0504	2.42641	0.667354	0.469069		2.31486	1.55613	0.136862
Brain - Cerebellum	41	-0.478367	1.00611	0.634458	0.293708		-1.63565	2.33115	0.487065	0.584467		-1.20491	1.55148	0.43738
Brain - Cortex	42	0.148608	0.875576	0.865225	0.783834		0.415428	2.08307	0.842936	0.885778		0.385652	1.47036	0.793102
Brain - Frontal Cortex (BA9)	42	0.170368	1.00779	0.865756	0.827172		-0.0387124	2.58111	0.988108	0.92862		0.896603	1.77673	0.613815
Brain - Hippocampus	43	0.365765	0.988374	0.711333	0.562286		-0.201206	2.16198	0.926305	0.768038		0.0414492	1.46721	0.977462
Brain - Hypothalamus	43	1.60955	0.782011	0.0395696	0.927947		-0.0328832	2.04336	0.987238	0.371444		2.05588	1.4175	0.146959
Brain - Nucleus accumbens (basal ganglia)	43	1.03321	0.935645	0.269473	0.723083		0.490506	2.29584	0.831879	0.793793		2.25724	1.49021	0.129845
Brain - Putamen (basal ganglia)	43	0.826916	1.0465	0.429428	0.242372		2.28681	2.23822	0.31291	0.464112		1.43409	1.58702	0.366188
Brain - Spinal cord (cervical c-1)	44	0.15416	0.983576	0.875454	0.787969		2.25066	1.89836	0.24245	0.185776		1.38728	1.63908	0.397344
Brain - Substantia nigra	43	0.83924	1.26333	0.506493	0.291788		-1.46452	2.95962	0.623359	0.394056		-0.203657	1.88655	0.914034
Breast - Mammary Tissue	43	-0.144855	0.313605	0.644152	0.958511		-1.83521	0.856057	0.0380295	0.0324306		-0.576578	0.571294	0.312855
Colon - Sigmoid	42	-0.960683	0.443263	0.030212	0.732498		-2.2173	0.832373	0.0110807	0.07214		-1.2045	0.761183	0.113558
Colon - Transverse	40	-0.0171677	0.23024	0.940561	0.978763		0.0550942	0.670461	0.93494	0.904837		-0.0591173	0.463042	0.898409
Esophagus - Gastroesophageal Junction	43	0.334597	0.596739	0.574996	0.534859		1.70482	1.44132	0.243693	0.300646		0.729352	0.917519	0.426661
Esophagus - Mucosa	42	-0.244872	0.328433	0.455923	0.201678		-0.127869	0.779002	0.870444	0.868936		-0.21464	0.486143	0.658839
Esophagus - Muscularis	42	-0.401781	0.576661	0.485967	0.11119		0.324737	1.36798	0.813571	0.560705		-0.255976	0.77805	0.742158
Heart - Atrial Appendage	42	-0.739164	0.525976	0.159927	0.437472		-0.646277	1.22968	0.602091	0.933632		-1.06366	0.787299	0.176686
Heart - Left Ventricle	43	0.0299617	0.357199	0.933152	0.680553		-0.195639	0.902243	0.829411	0.784238		-0.105682	0.562388	0.850942
Liver	42	1.2436	0.504557	0.0137118	0.697809		1.16964	0.958827	0.22966	0.926131		1.0984	0.859997	0.201528
Lung	41	-0.652726	0.367956	0.0760758	0.805761		-0.0886463	0.951898	0.92628	0.515237		-0.675315	0.644172	0.294479
Minor Salivary Gland	42	0.991864	0.950089	0.296499	0.630438		1.64449	3.21155	0.611428	0.831853		1.42154	1.42667	0.319052
Muscle - Skeletal	41	0.295029	0.329996	0.371302	0.660421		0.200574	0.802524	0.803954	0.896689		0.0315633	0.548573	0.954117
Nerve - Tibial	41	-0.483027	0.437898	0.270002	0.395605		-0.431713	0.982673	0.662851	0.953637		-0.668139	0.646543	0.301415
Ovary	43	1.81846	0.716631	0.0111642	0.881837		1.46151	1.9406	0.455679	0.839863		2.60139	1.33627	0.0515646
Pancreas	41	0.0953461	0.623364	0.878434	0.047719		2.1734	1.37225	0.121311	0.0989818		1.20342	0.83908	0.151511
Pituitary	43	-1.25328	0.693482	0.070727	0.974914		-1.3795	1.93987	0.481031	0.942131		-0.852248	1.34917	0.527593
Prostate	42	-1.35902	0.841391	0.106265	0.296609		-1.38748	1.92603	0.475479	0.98694		-0.854855	1.26959	0.500738
Skin - Not Sun Exposed (Suprapubic)	42	-0.190542	0.437856	0.663439	0.831739		-1.30024	1.13987	0.260785	0.28669		0.0203629	0.748119	0.978285
Skin - Sun Exposed (Lower leg)	42	0.334738	0.439543	0.446322	0.382467		0.303253	1.05998	0.776283	0.974055		0.781201	0.645464	0.226166
Small Intestine - Terminal Ileum	42	-0.560625	0.475881	0.238765	0.20061		0.0155822	1.31207	0.990584	0.639534		-0.458342	0.671971	0.495184
Stomach	42	0.0334239	0.574222	0.953583	0.574183		-0.704745	1.37368	0.610748	0.554983		0.284306	0.939122	0.762091
Testis	42	-0.0707144	0.265977	0.790342	0.329552		-0.064098	0.610747	0.91694	0.99043		0.0260951	0.401692	0.948204
Thyroid	42	1.50173	0.420713	0.000357686	0.542239		1.55973	0.986135	0.121603	0.948234		1.36755	0.699701	0.0506456
Uterus	42	-1.64066	1.19868	0.171088	0.0567817		-3.41204	2.07663	0.108209	0.302741		-2.43331	1.56077	0.118986
Vagina	43	-1.39228	0.700544	0.0468743	0.124082		-3.71744	1.62246	0.0271602	0.1212		-2.79294	0.971553	0.00404395

[truncated: 8 more sheets: SFile 1k Drk Ex_palindromy, SFile 1l Smk Ex_pleiotropy, SFile 1m Cig Ex_pleiotropy, SFile 1n Drk Ex_pleiotropy, SFile 1o Cig COVID-19, SFile 1p Drk COVID-19, SFile 1q COVID Ex_palindromic, SFile 1r COVID Ex_pleiotropy]
